# Supplementary material for: Seizures associated with antibodies against cell surface antigens are acute symptomatic and not indicative of epilepsy: insights from long-term data
Source: Springer Nature journal article supplement (doi:10.1007/s00415-020-10250-6), 2020-10-06
Supplement: MOESM1 [file 18453734]

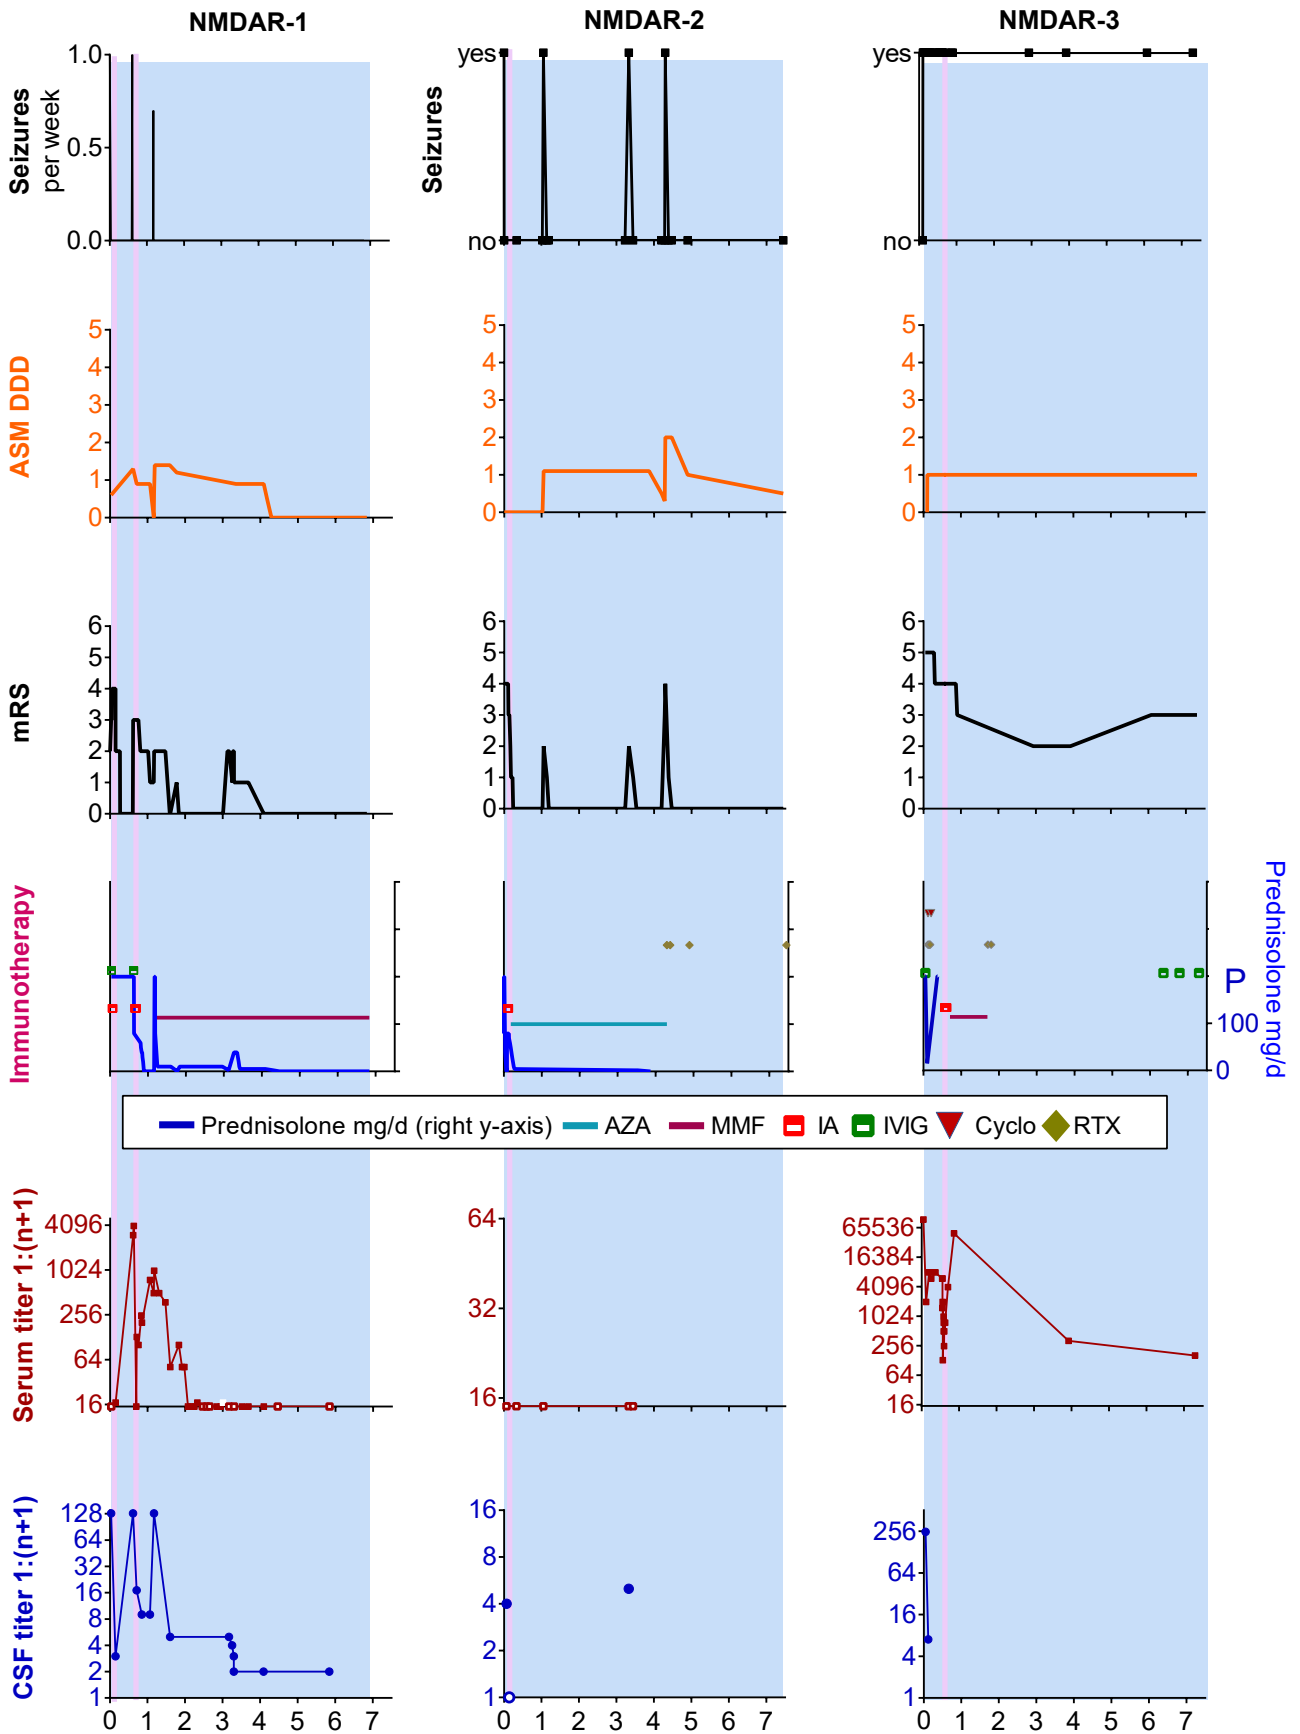

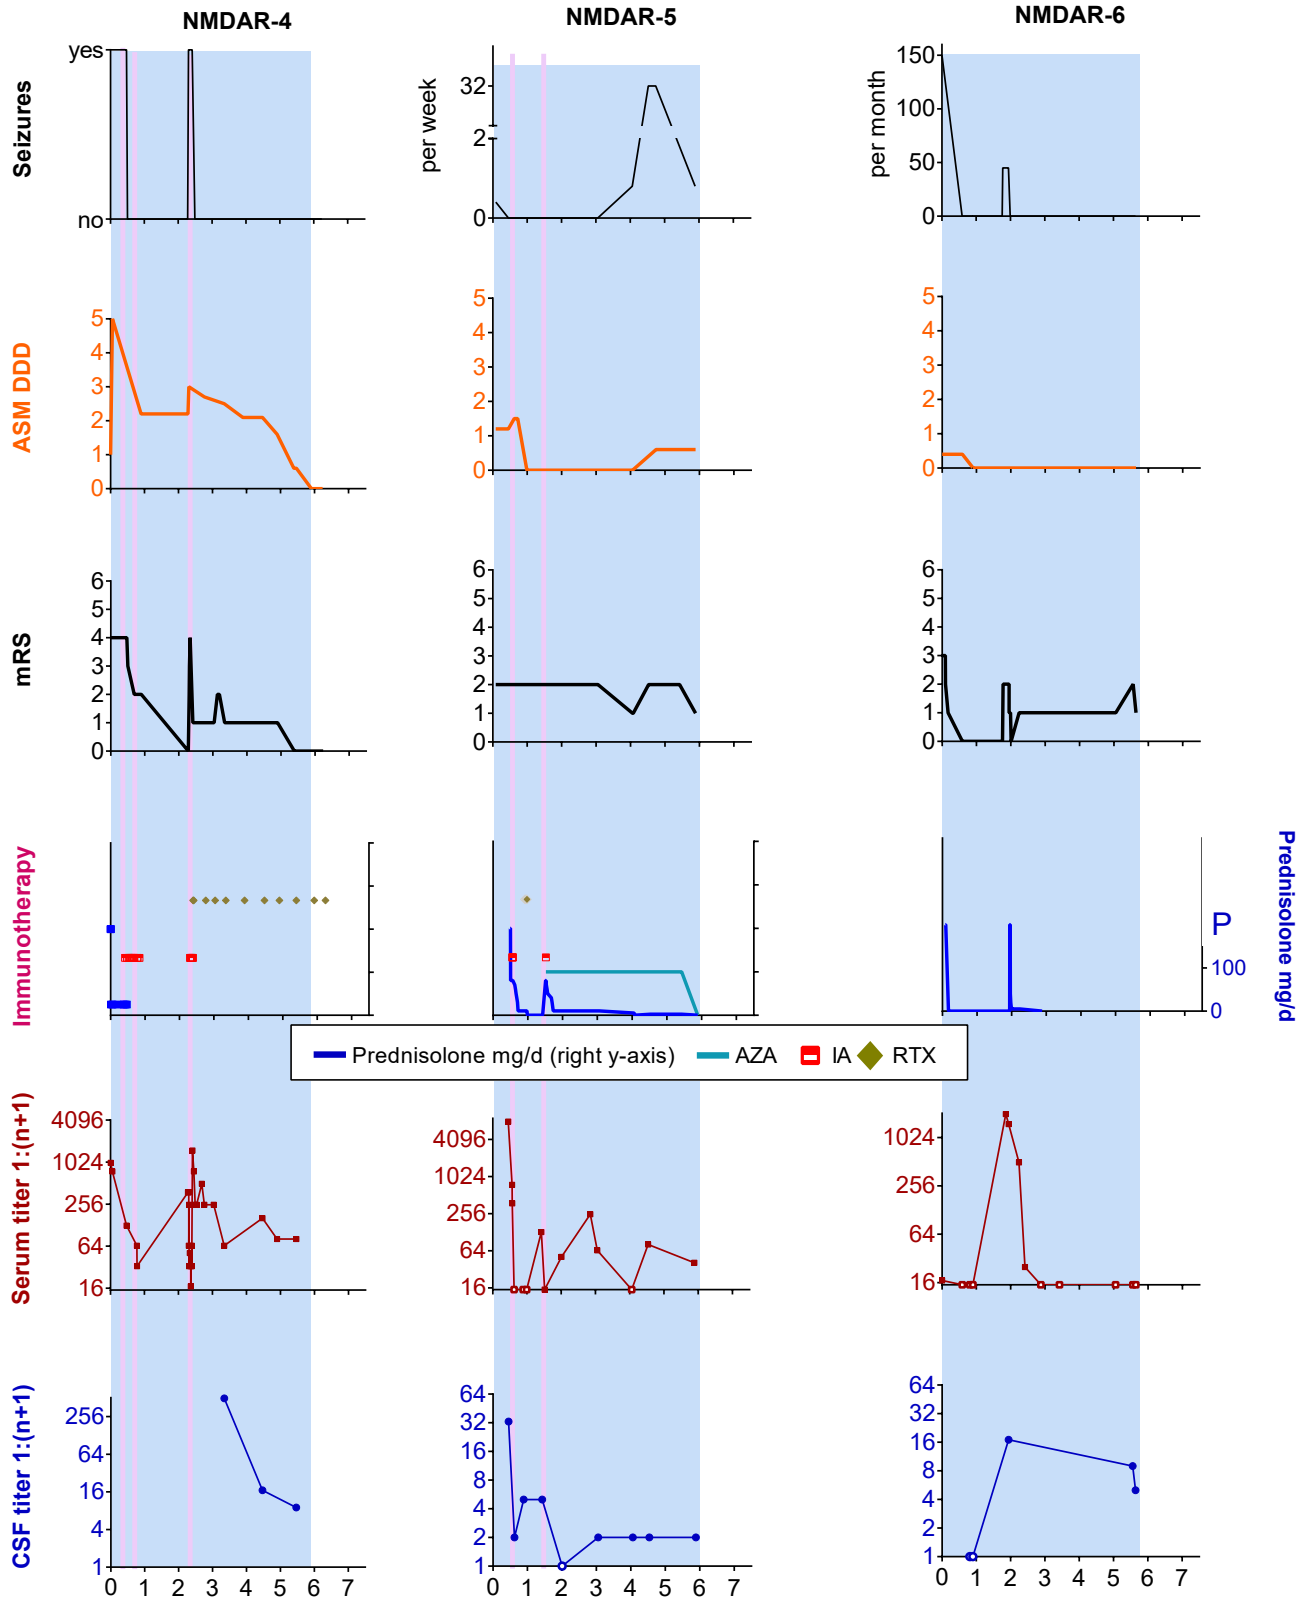

**LGI1-1**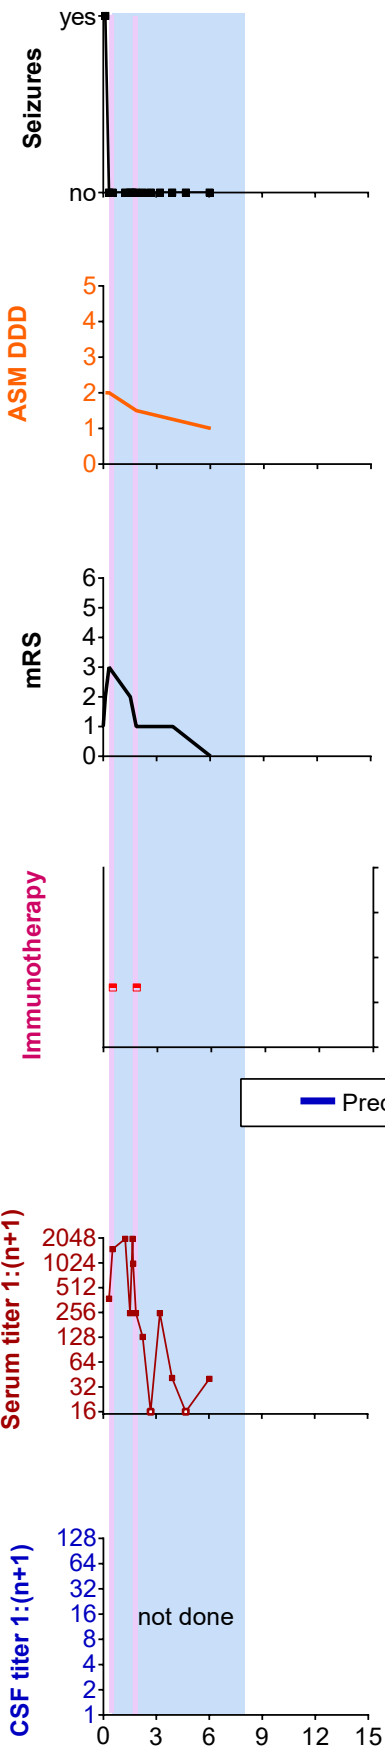**LGI1-2**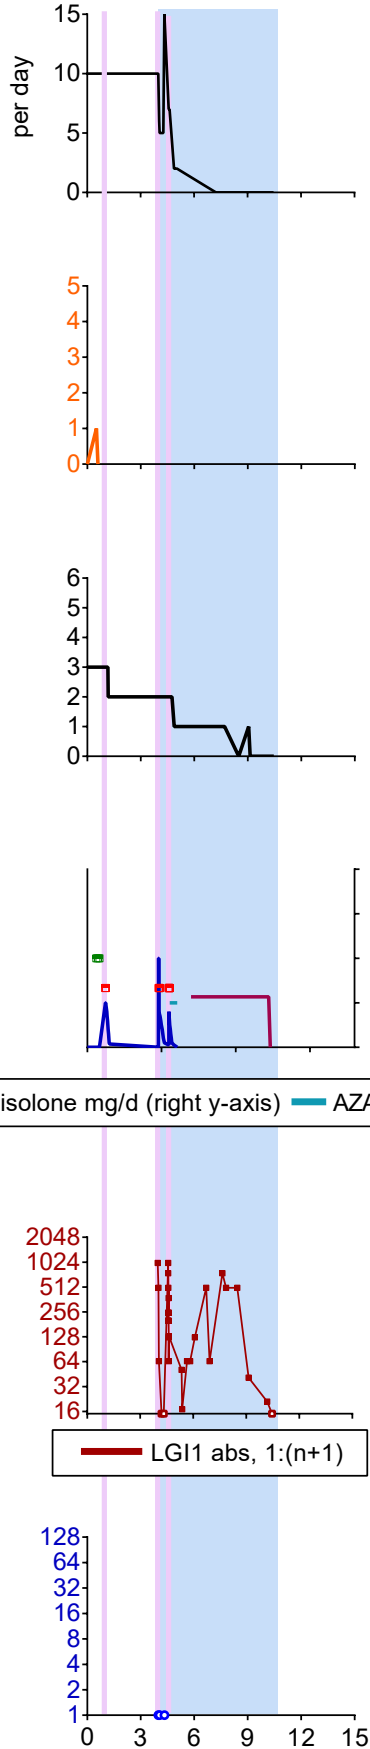**LGI1-3**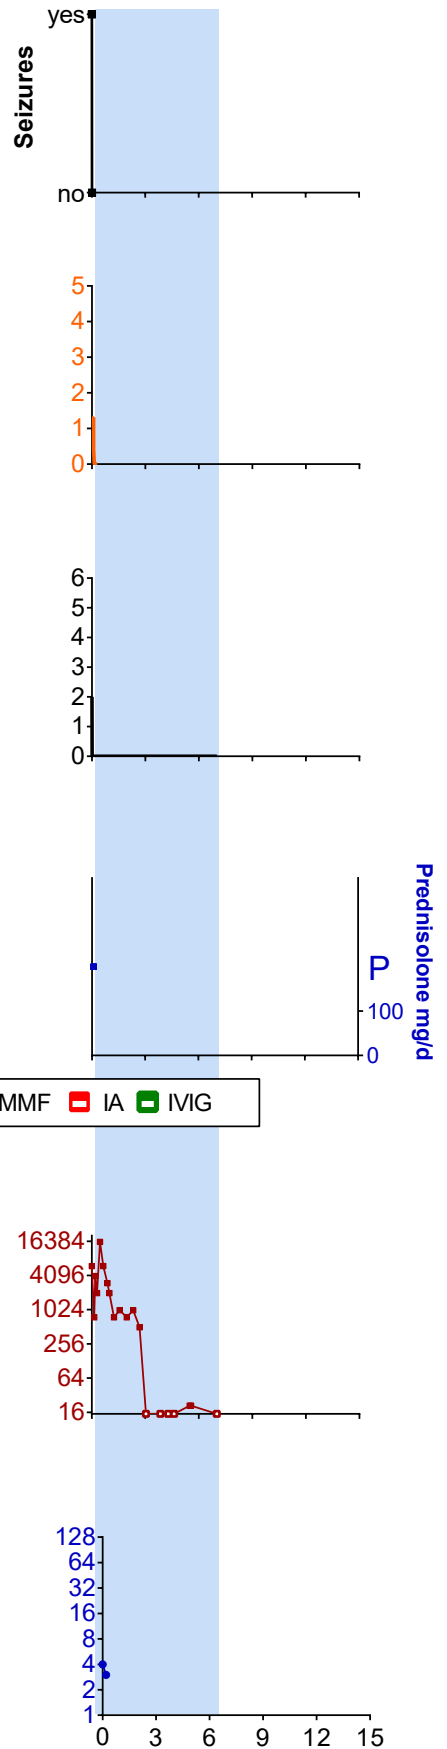

■ Prednisolone mg/d (right y-axis)
 ■ AZA
 ■ MMF
 ■ IA
 ■ IVIG

— LGI1 abs, 1:(n+1)

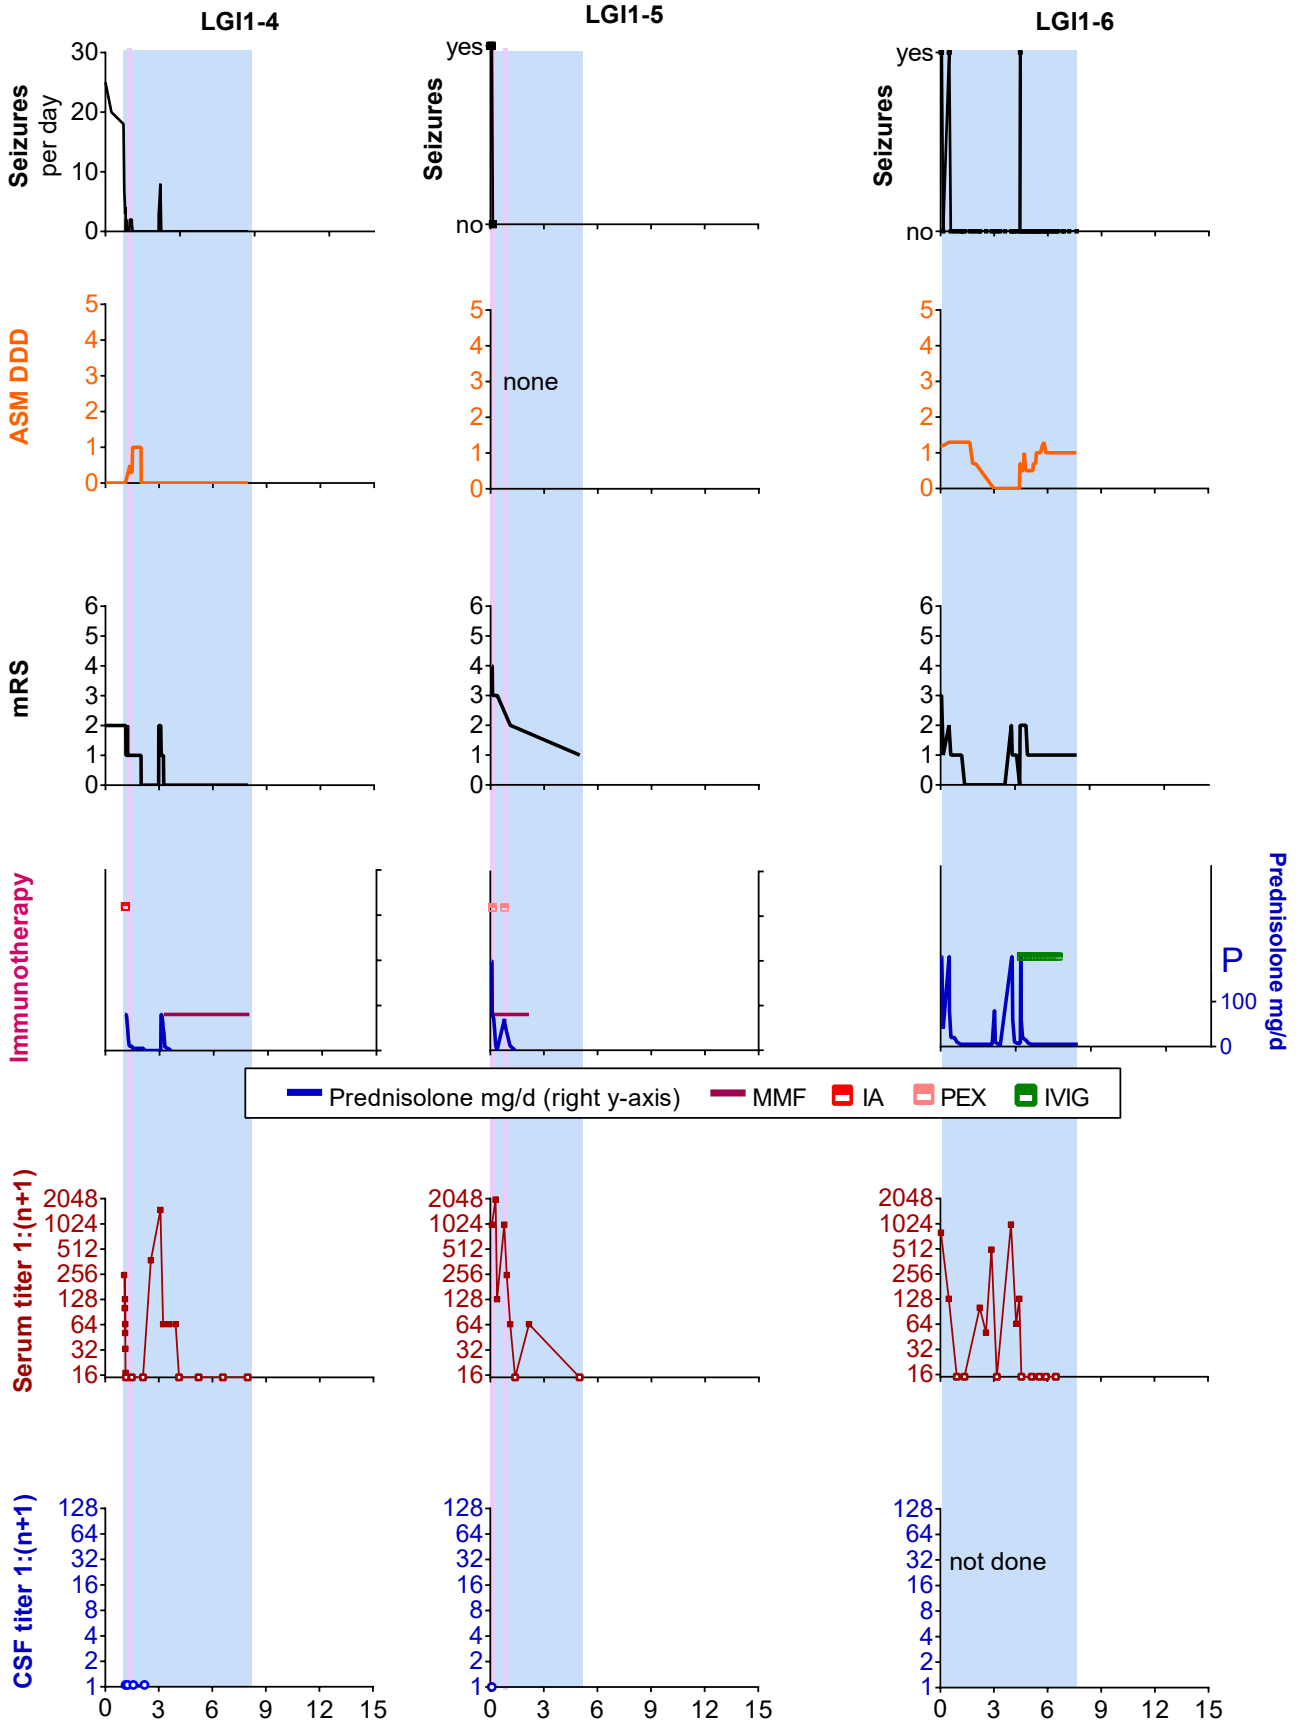

**LG11-7**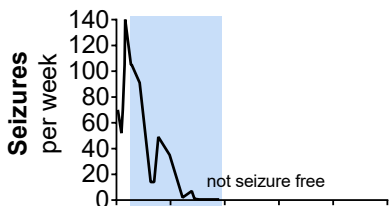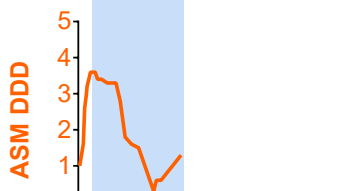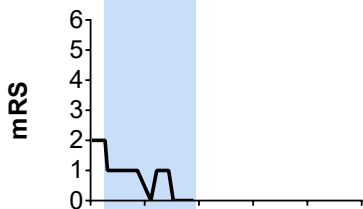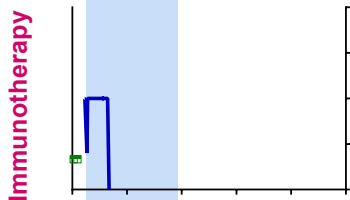

— Prednisolone mg/d (right y-axis) 
 — AZA 
 — MMF 
 ■ IA 
 ■ IVIG

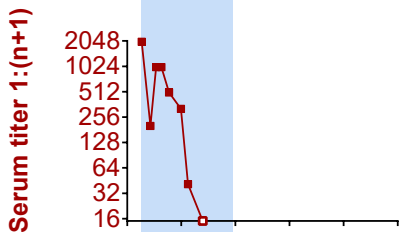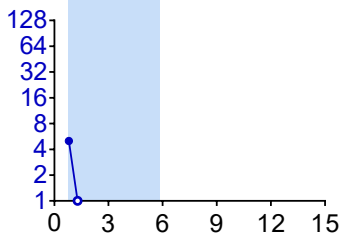**LG11-8**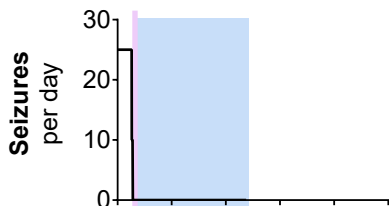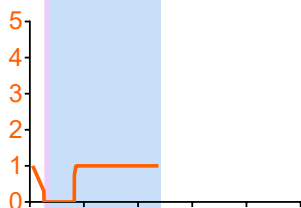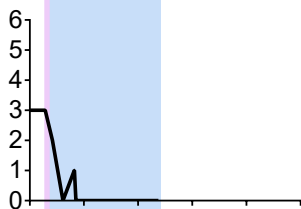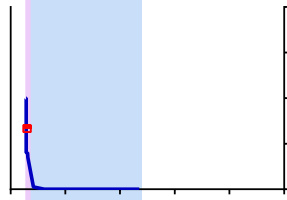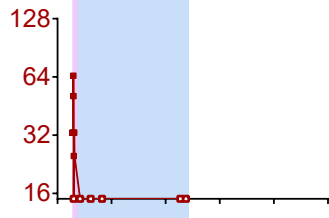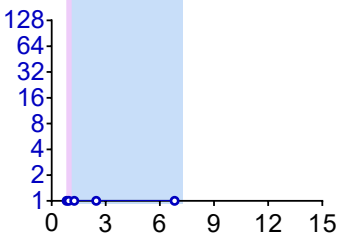**LG11-9**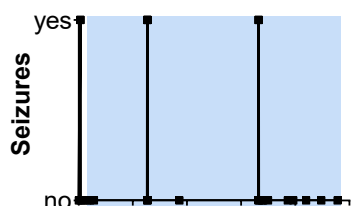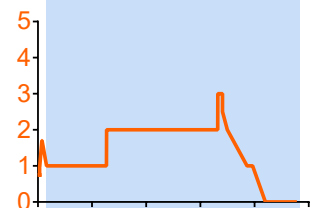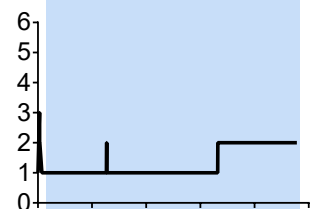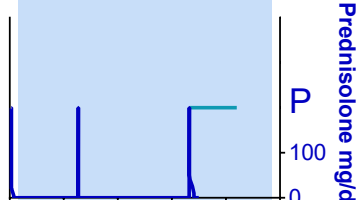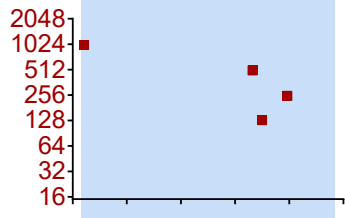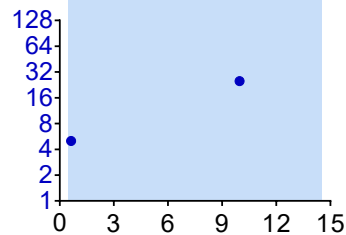

### LGI1-10

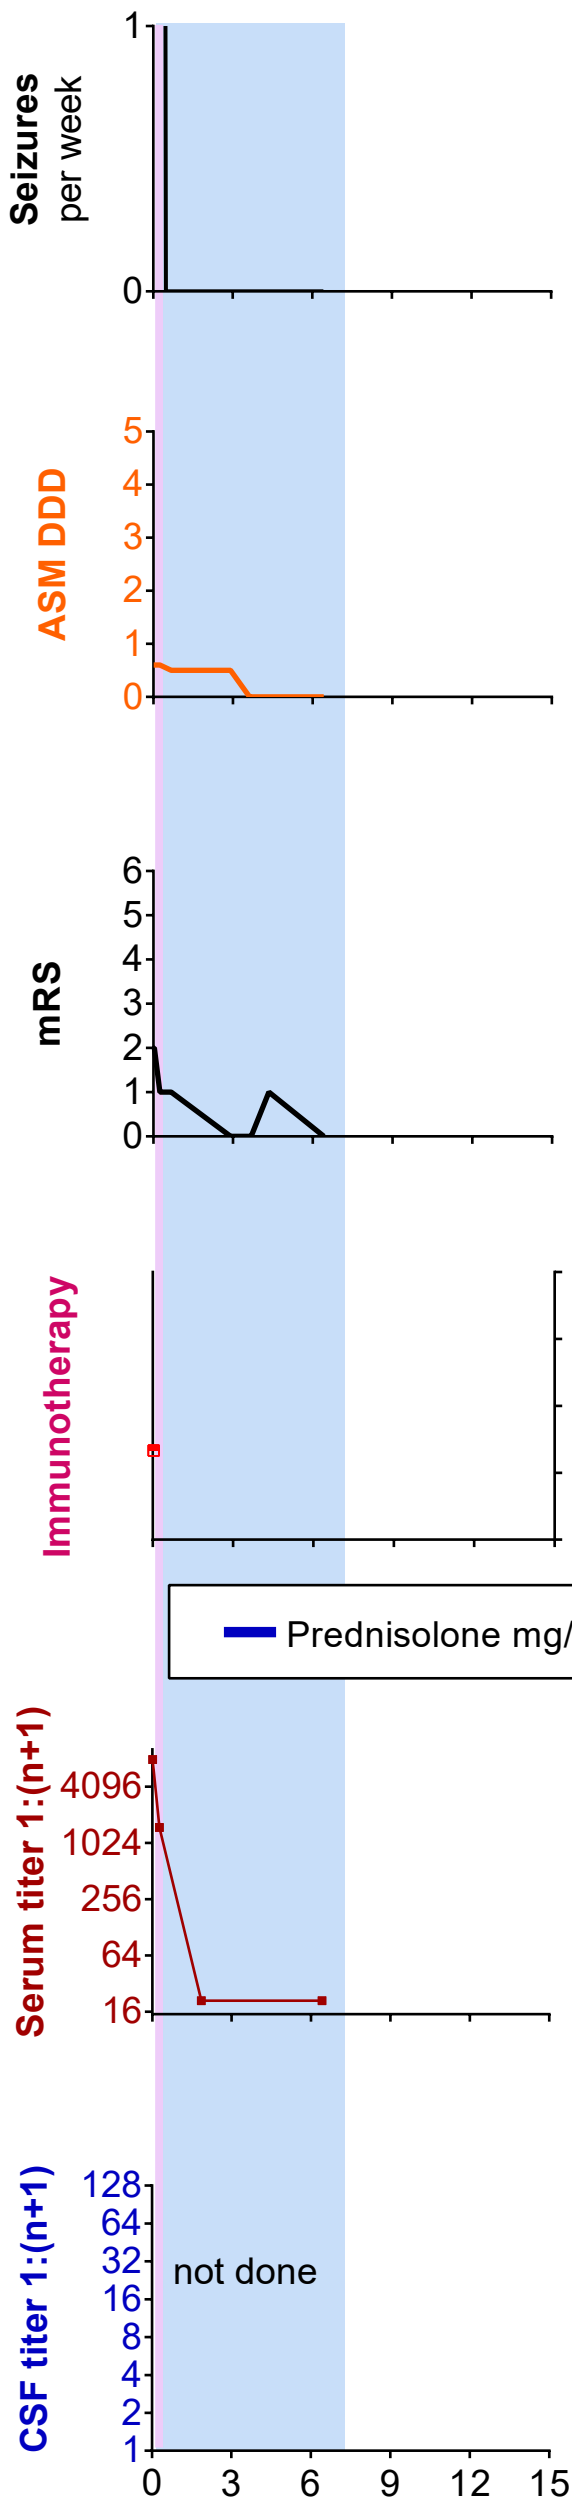

### LGI1-11

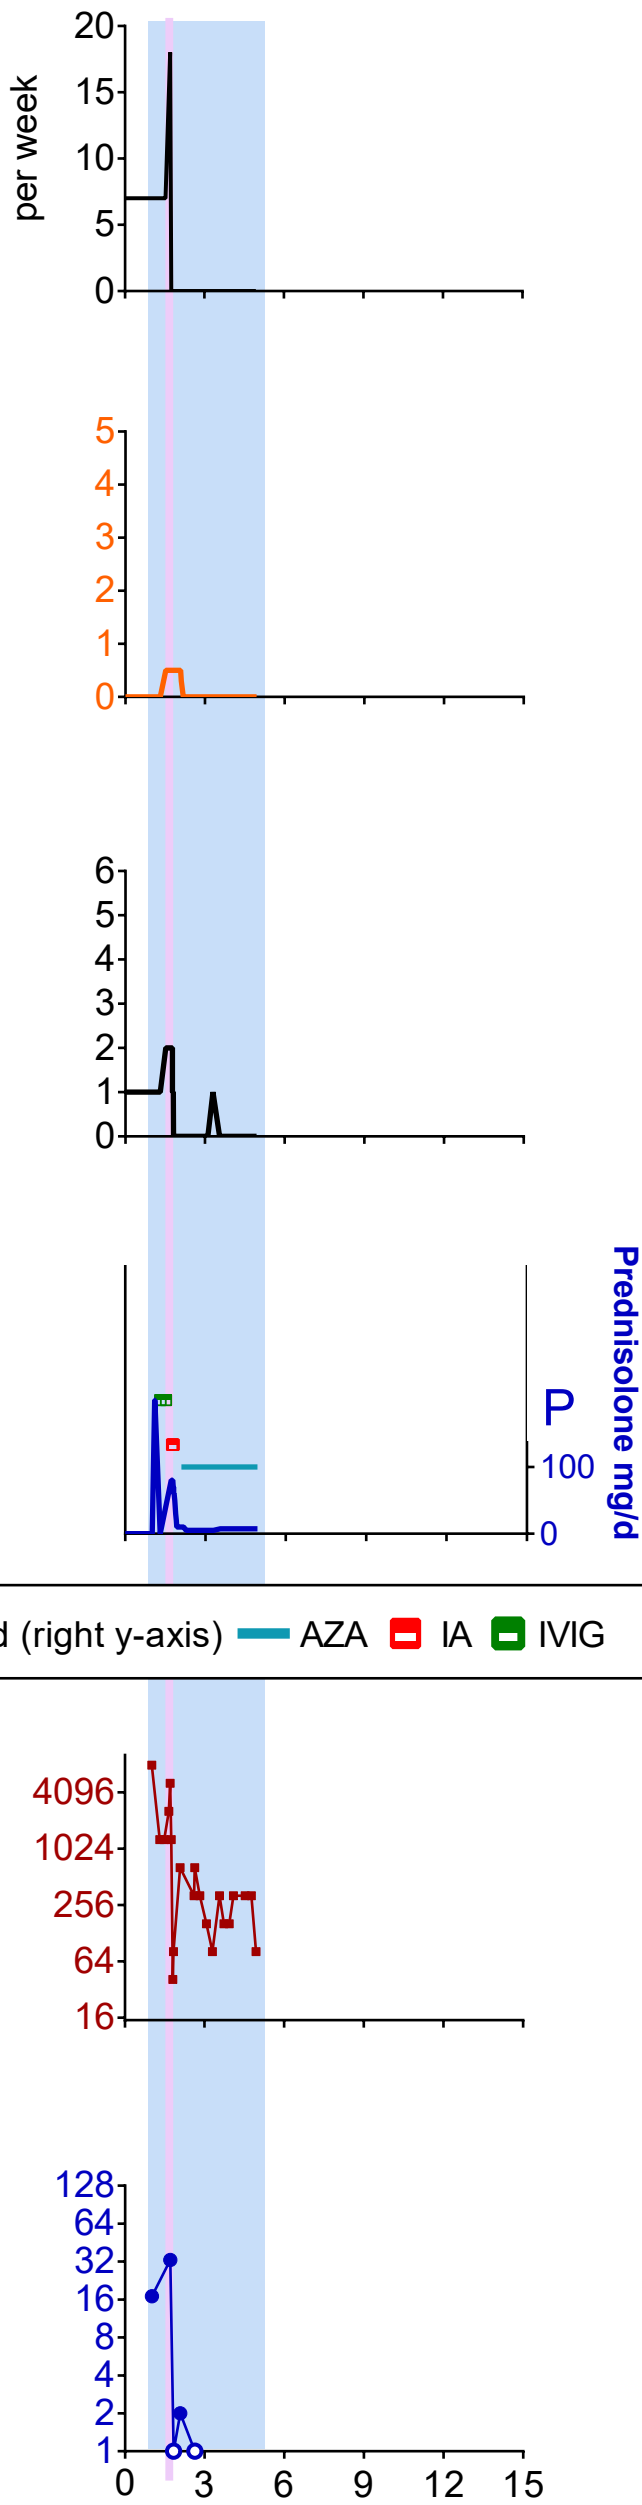

— Prednisolone mg/d (right y-axis) — AZA ■ IA ■ IVIG

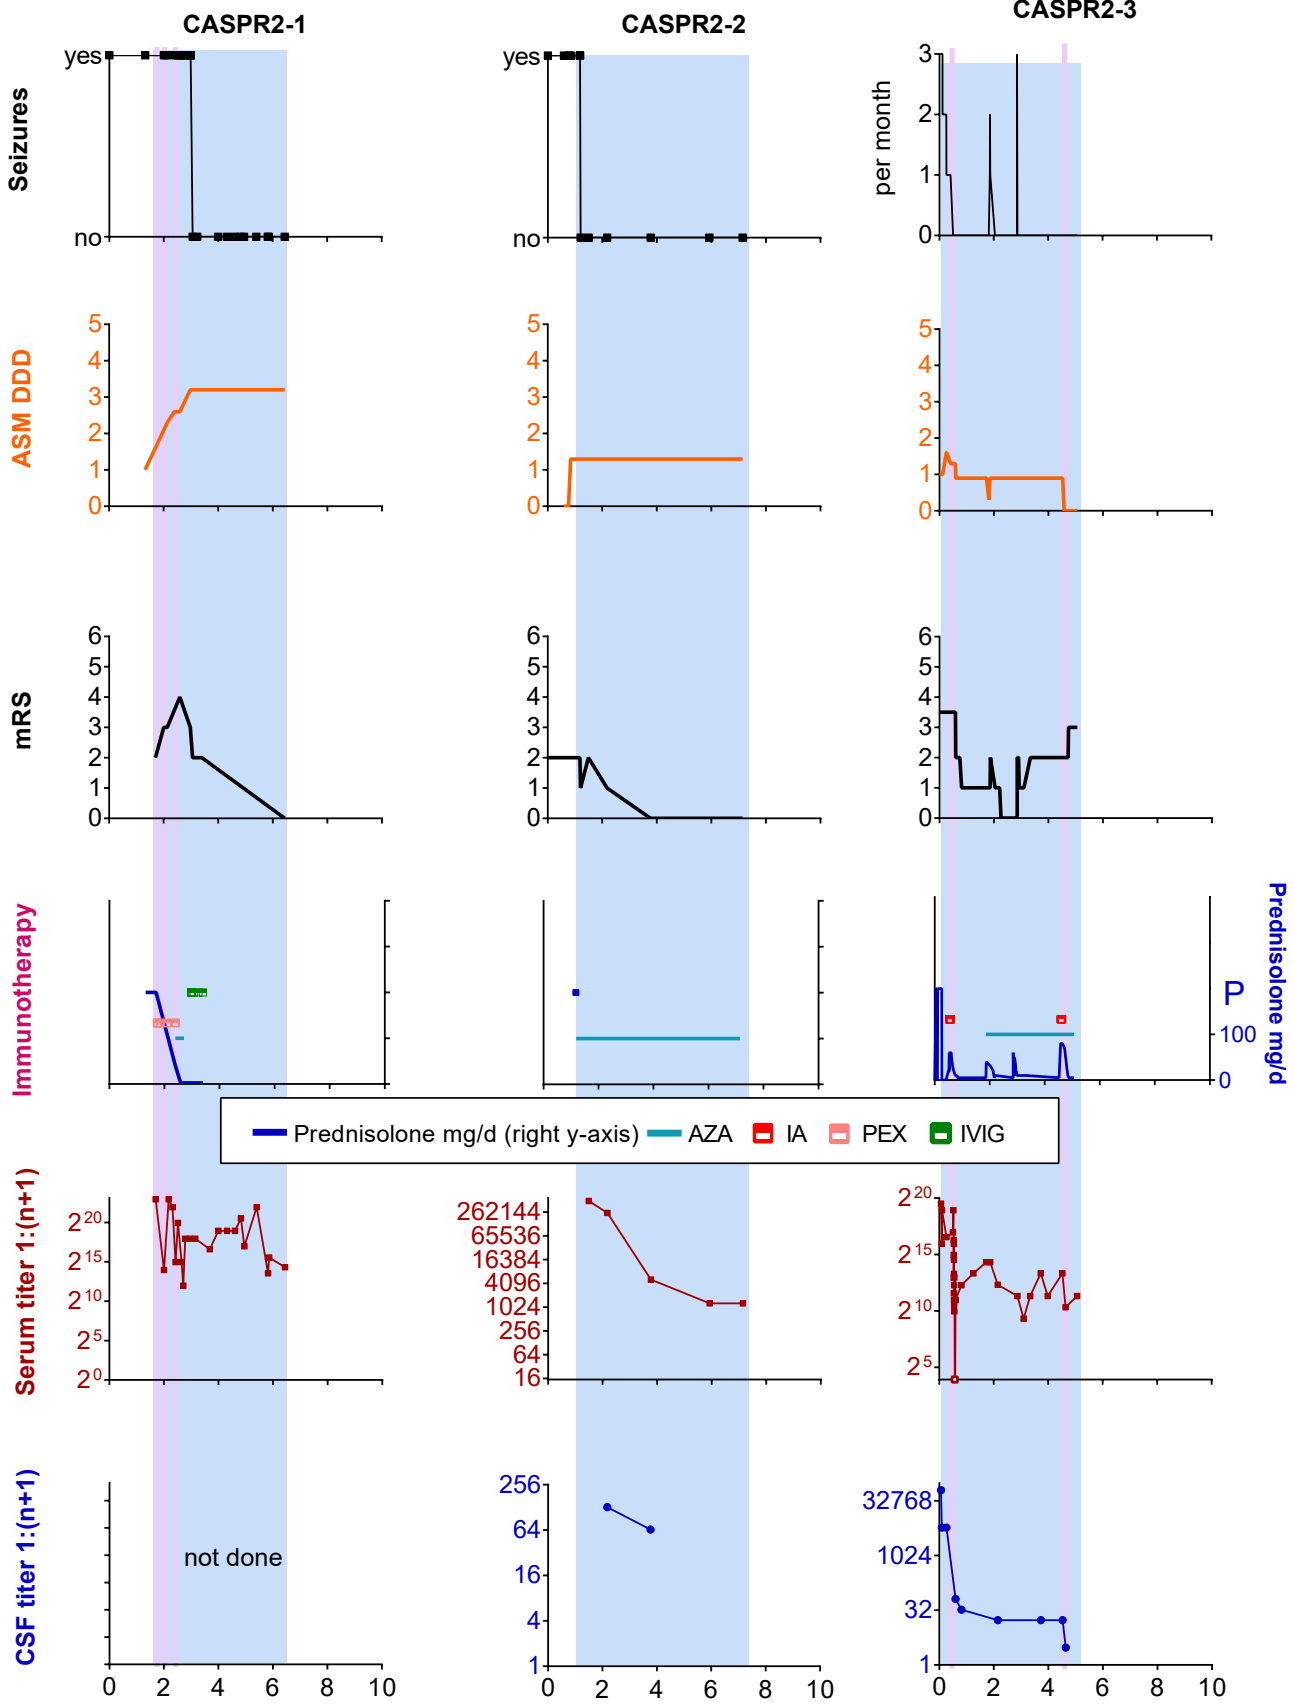

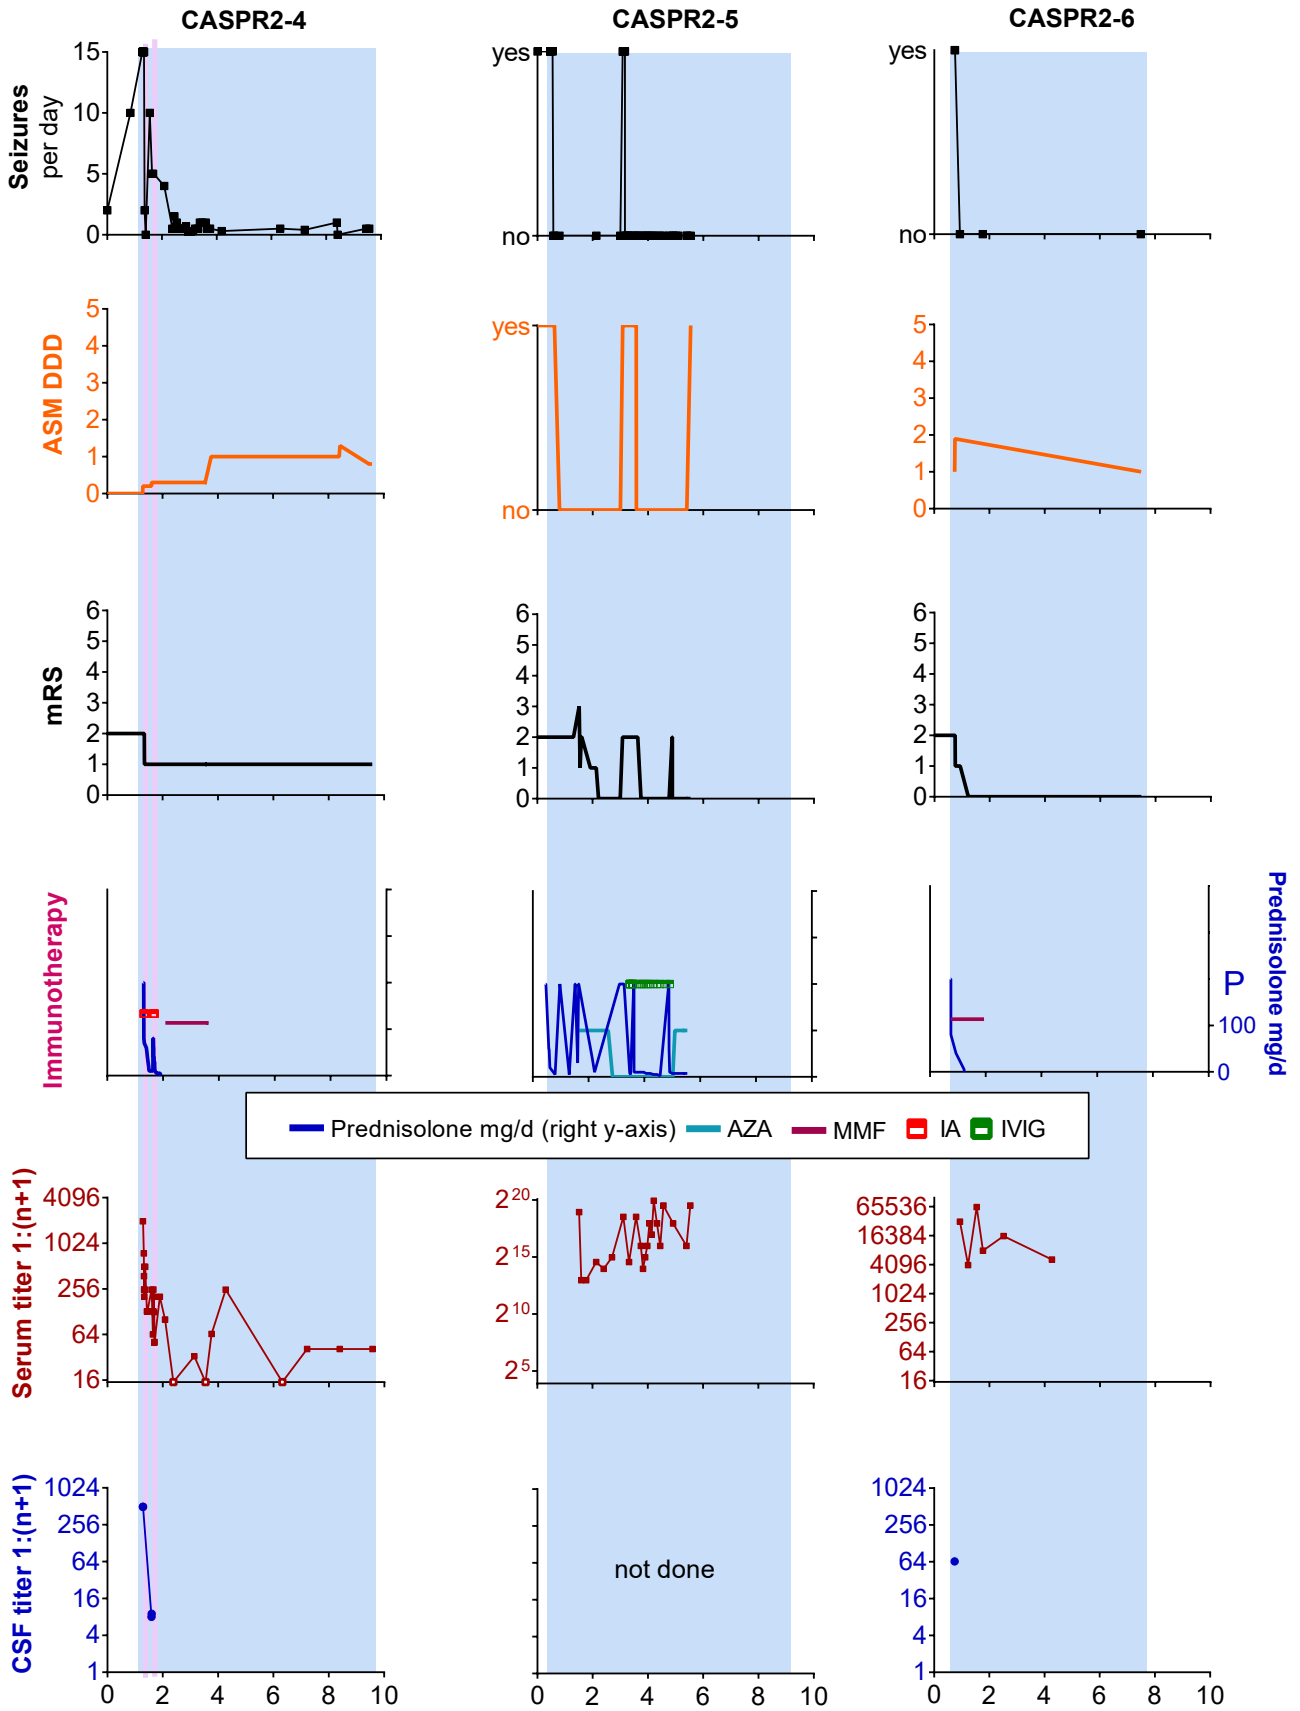



### CASPR2-7

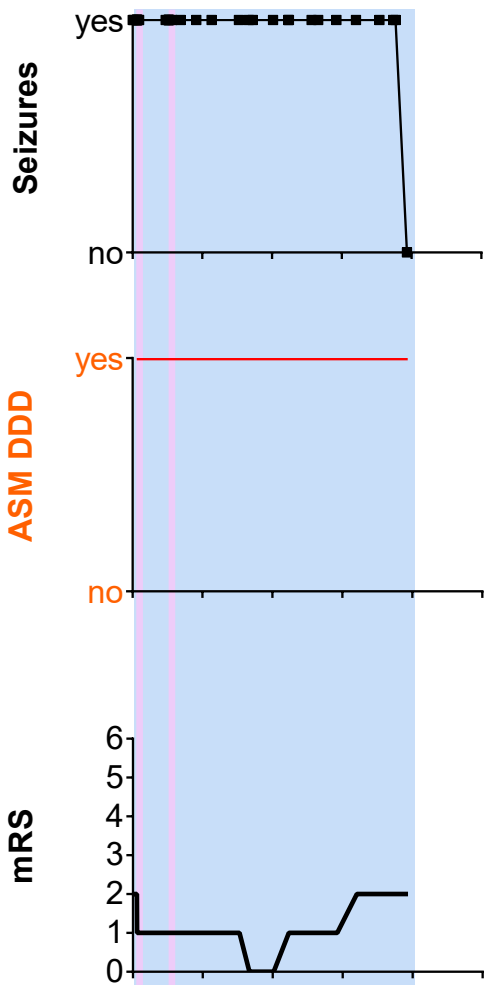

### CASPR2-8

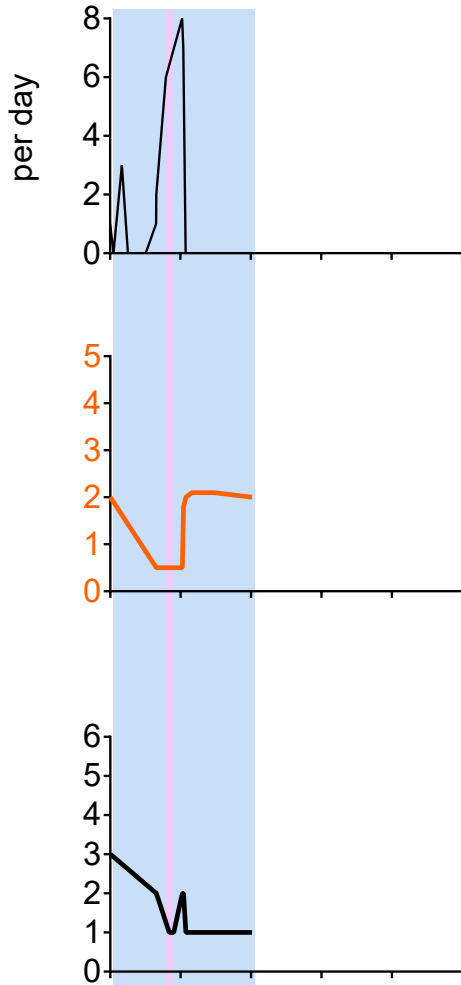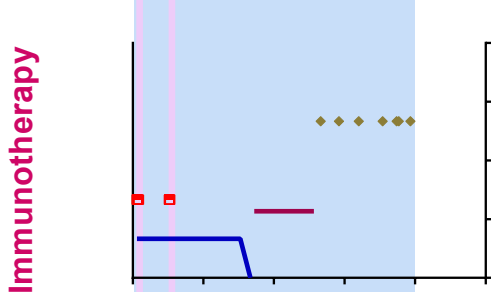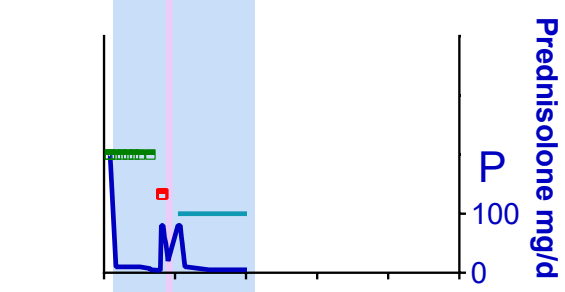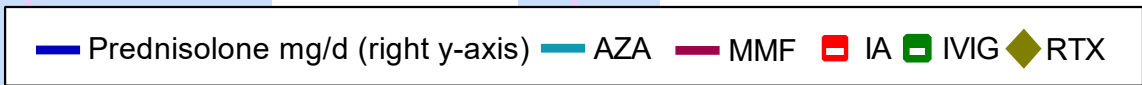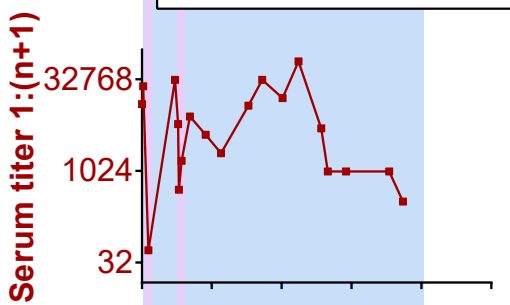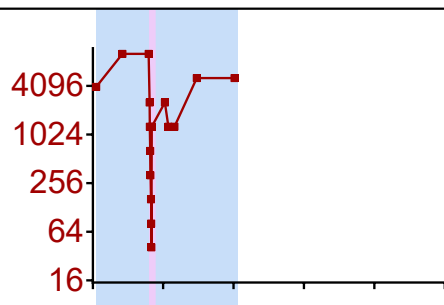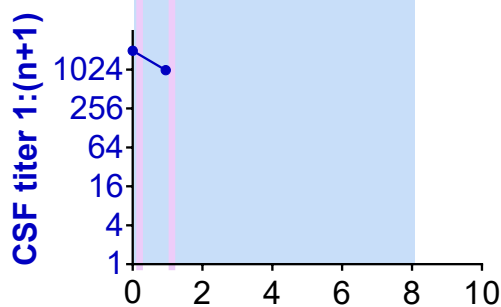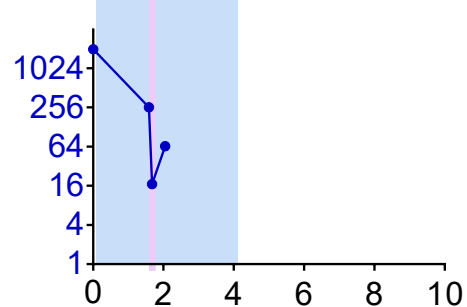

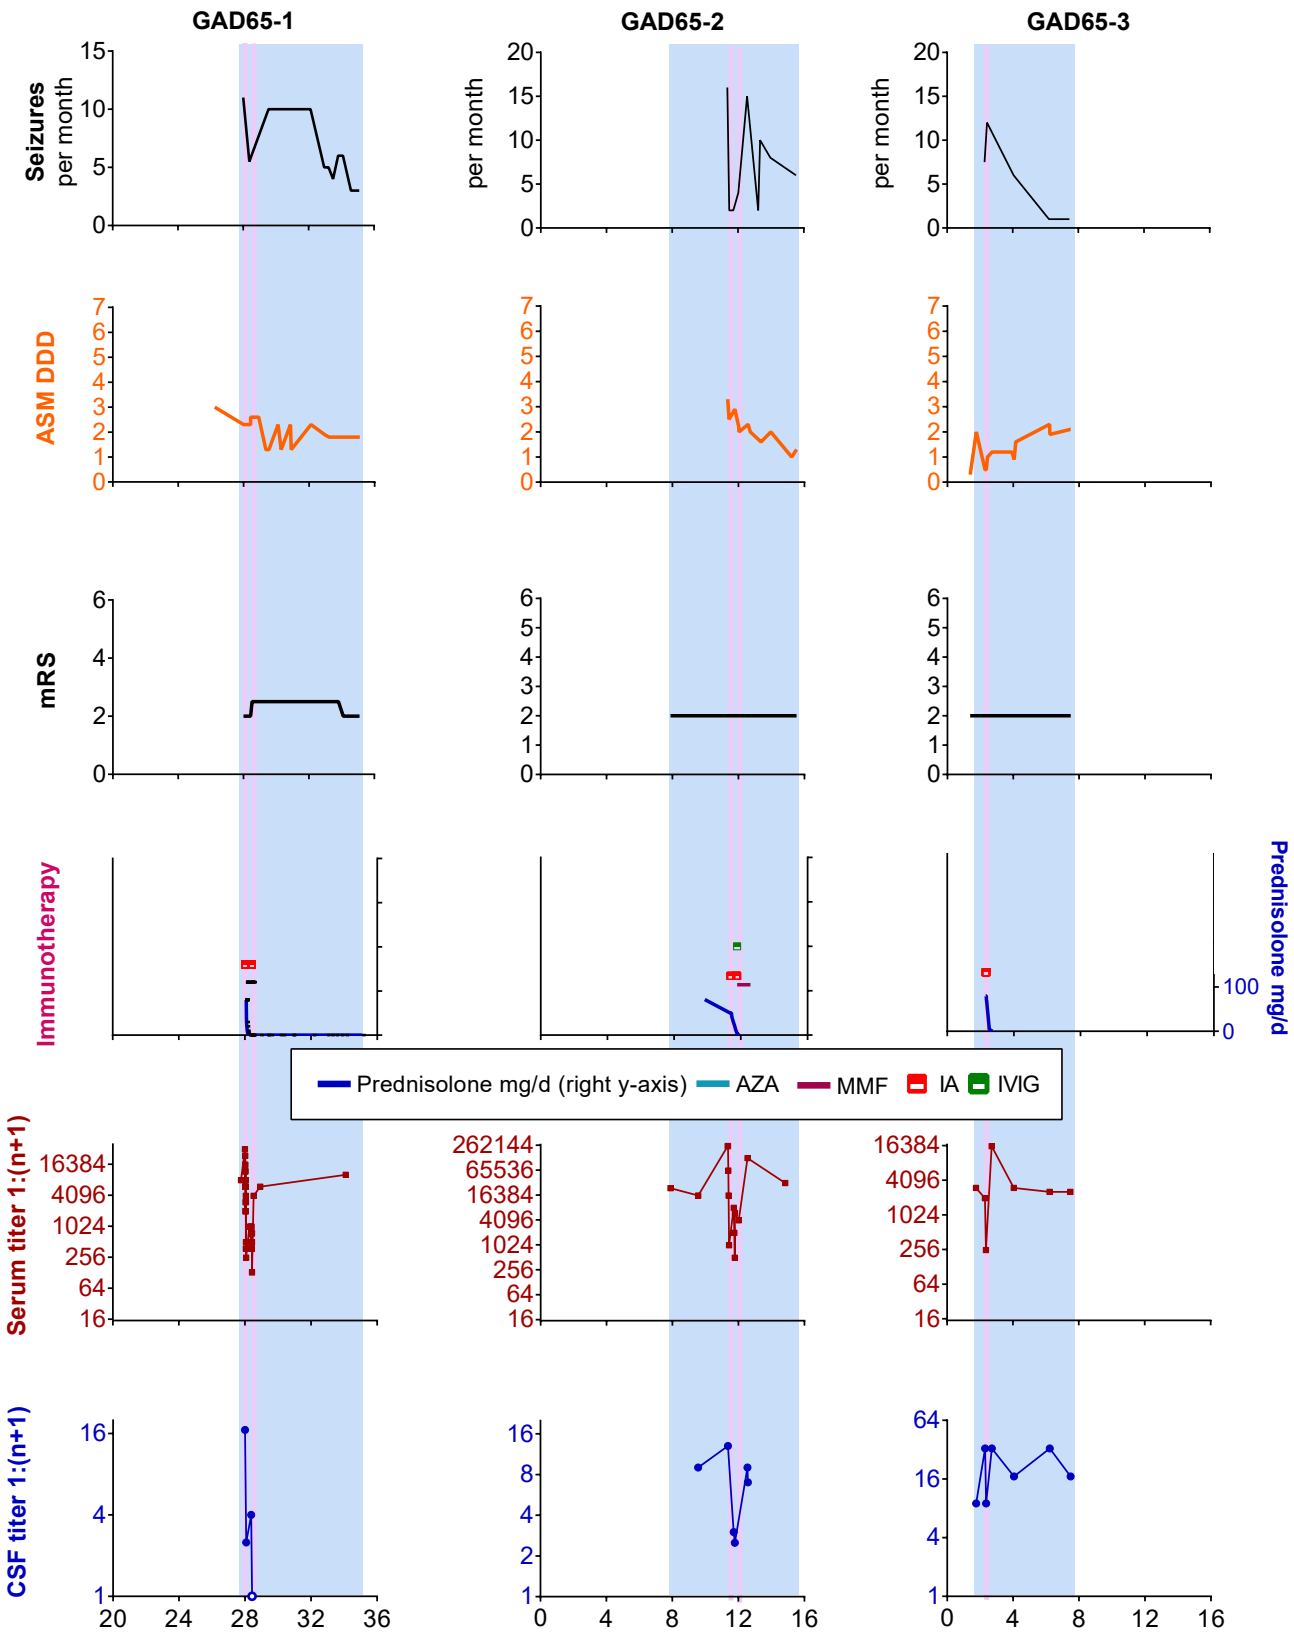

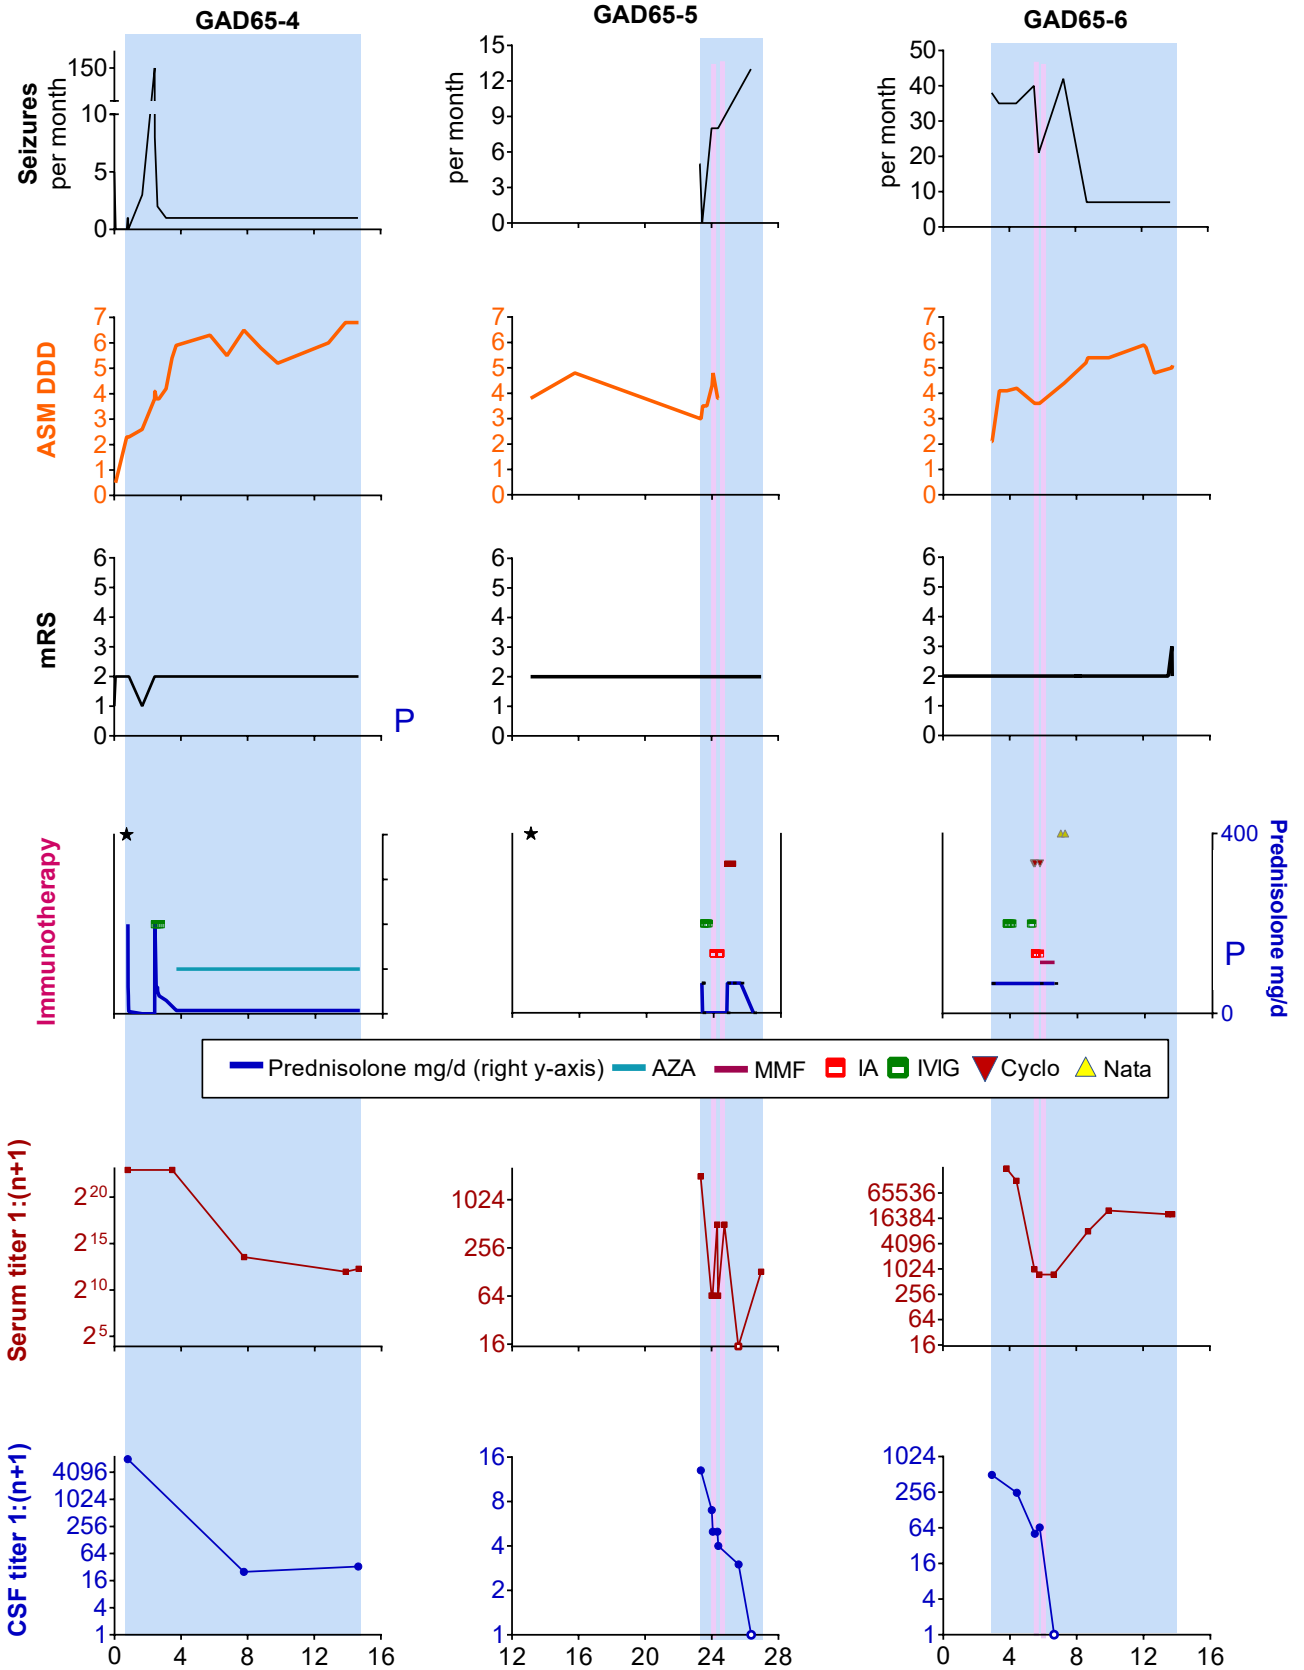

Seizures per month

ASM DDD

mRS

Immunotherapy

Serum titer 1:(n+1)

CSF titer 1:(n+1)

Prednisolone mg/d

P

P

220  
215  
210  
25  
16

65536  
16384  
4096  
1024  
256  
64  
16

16  
8  
4  
2  
1

1024  
256  
64  
16  
4  
1

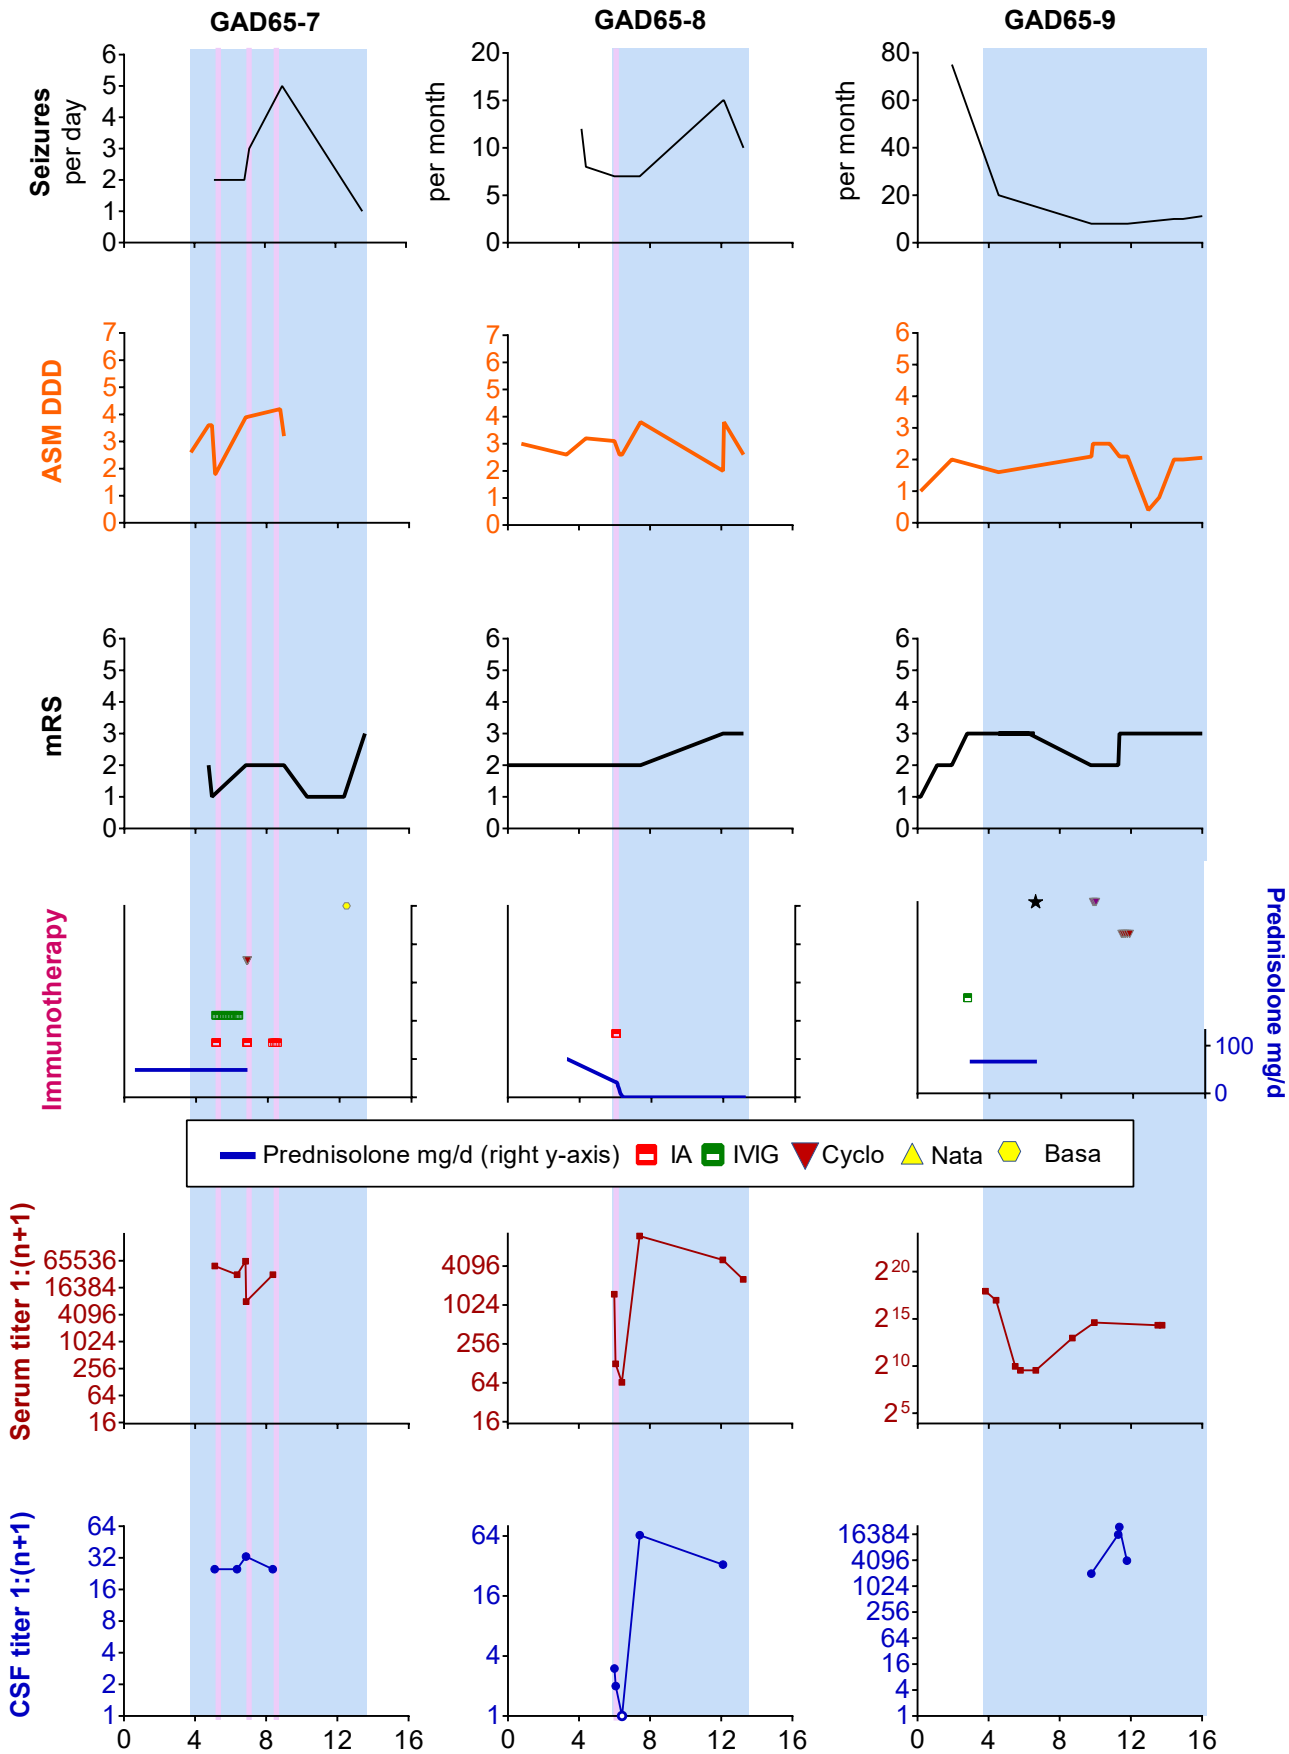

### GAD65-10

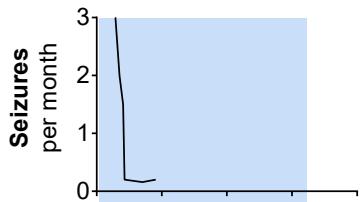

ASM DDD

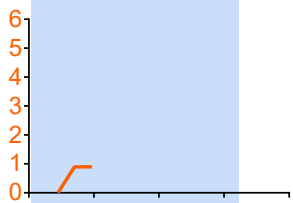

mRS

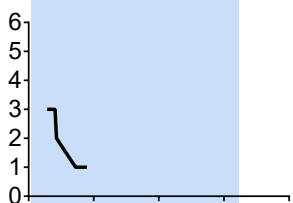

Immunotherapy

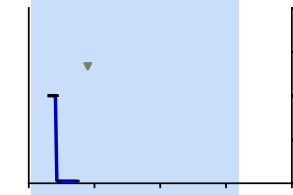

Serum titer 1:(n+1)

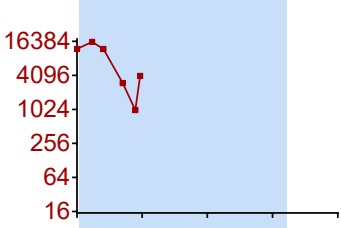

CSF titer 1:(n+1)

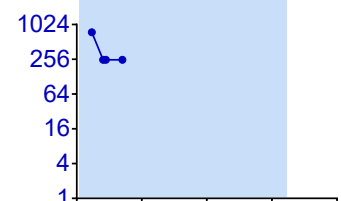

### GAD65-11

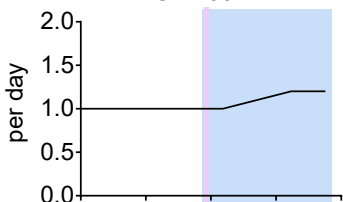

ASM DDD

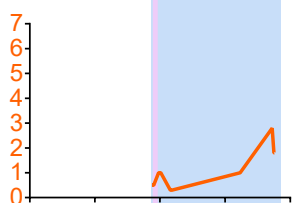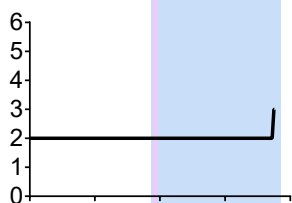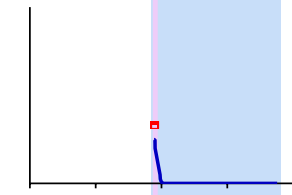

Serum titer 1:(n+1)

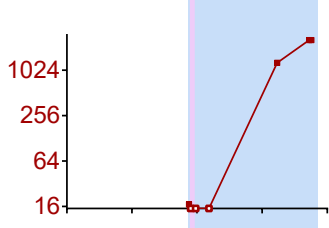

CSF titer 1:(n+1)

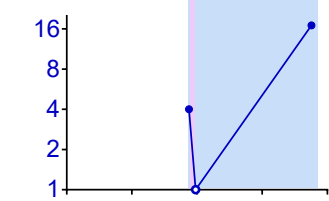

### GAD65-12

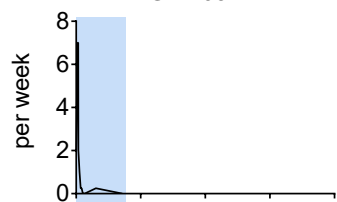

ASM DDD

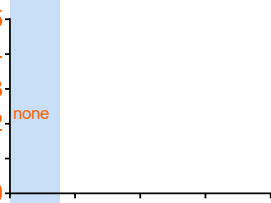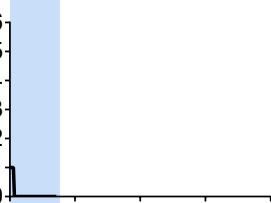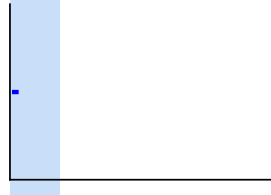

Serum titer 1:(n+1)

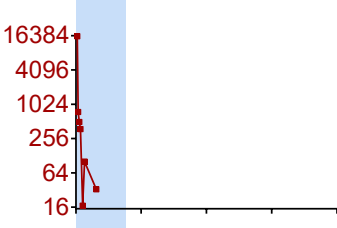

CSF titer 1:(n+1)

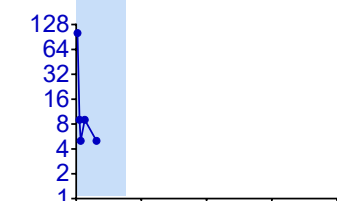

— Prednisolone mg/d (right y-axis) ■ IA ◆ RTX

Prednisolone mg/d

### GAD65-13

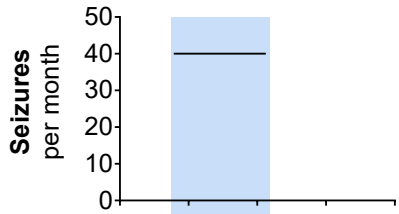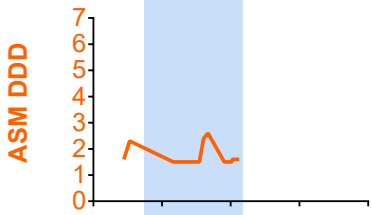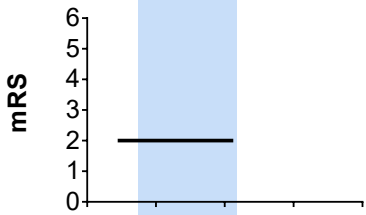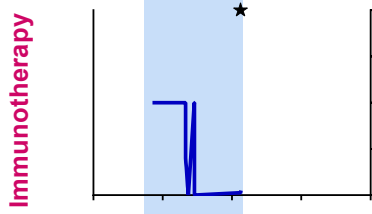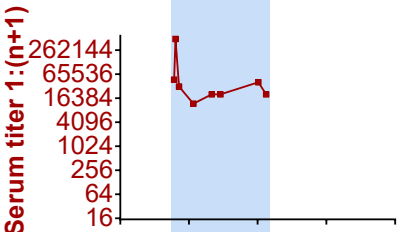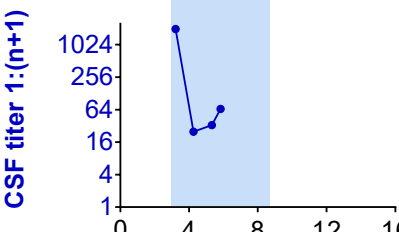

### Ma2

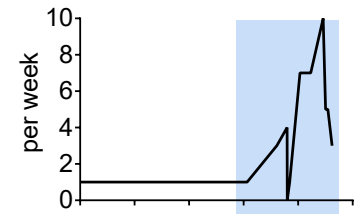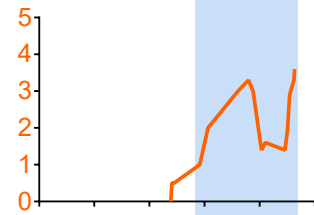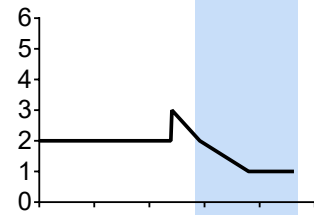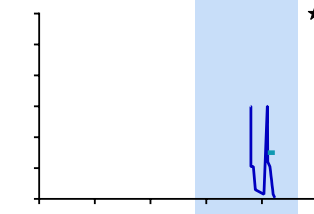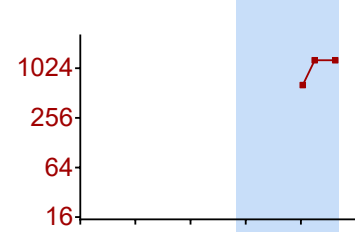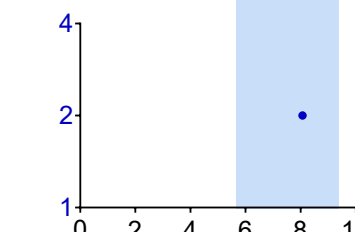

— Prednisolone mg/d (right y-axis) — AZA

P  
100  
0  
Prednisolone mg/d

## Supplementary Tables

Supplementary table 1: Individual patients' data

| Refs, descriptive statistics | Patient no., sex | Age at disease onset [y] | Time to antibody diagnosis [mo after onset] | ASM, maximum DDD | Time to start of first immunotherapy [mo after onset] | No. of immunotxs | Immunotherapies               | Duration of immunotherapy [mo] <sup>1</sup> | No. of relapses | Time to last follow-up [mo after onset] | From ab detection to last follow-up [mo] | Time to first seizure freedom [mo after onset] | Time to terminal seizure freedom [mo after onset] | Duration of seizure freedom at most recent follow-up [mo] | Duration to discontinuation of ASM [mo] |
|------------------------------|------------------|--------------------------|---------------------------------------------|------------------|-------------------------------------------------------|------------------|-------------------------------|---------------------------------------------|-----------------|-----------------------------------------|------------------------------------------|------------------------------------------------|---------------------------------------------------|-----------------------------------------------------------|-----------------------------------------|
| 4,5                          | NMDAR-1, m       | 14                       | 0.4                                         | 1.4              | 0.4                                                   | 4                | Pred, IA, IVIG, MMF           | 53.6                                        | 5               | 82.0                                    | 81.6                                     | 14.1                                           | 14.1                                              | 67.9                                                      | 51.5                                    |
| 4,5                          | NMDAR-2, f       | 19                       | 0                                           | 1.1              | 0                                                     | 4                | Pred, IA, Aza, Rtx            | 89.4 <sup>2</sup>                           | 3               | 89.4                                    | 89.4                                     | 0.1                                            | 41.0                                              | 36.7                                                      | Ongoing                                 |
| 4                            | NMDAR-3, f       | 2                        | 0.6                                         | 1.5              | 0.6                                                   | 6                | Pred, IA, IVIG, Rtx, Cyc, MMF | 87.0 <sup>2</sup>                           | Never remitted  | 87.6                                    | 87.0                                     | Ongoing                                        | Ongoing                                           | Ongoing                                                   | Ongoing                                 |
| 4                            | NMDAR-4, f       | 17                       | 0.1                                         | 5                | 0                                                     | 4                | Pred, IA, Cyc, Rtx            | 74.9 <sup>2</sup>                           | 1               | 74.9                                    | 74.8                                     | 6.0                                            | 33.2                                              | 41.7                                                      | Ongoing                                 |
| 4,5                          | NMDAR-5, f       | 18                       | 5.4                                         | 1.5              | 5.9                                                   | 4                | Pred, IA, Rtx, Aza            | 64.8                                        | Never remitted  | 70.7                                    | 65.3                                     | Ongoing                                        | Ongoing                                           | Ongoing                                                   | Ongoing                                 |
| 4                            | NMDAR-6, f       | 6                        | 0                                           | 0.4              | 1                                                     | 2                | Pred                          | 33.5                                        | 1               | 67.7                                    | 67.7                                     | 7.1                                            | 23.9                                              | 43.8                                                      | 10.8                                    |
| <b>Med</b>                   | m/f: 1/5         | <b>16</b>                | <b>0.3</b>                                  | <b>1.5</b>       | <b>0.5</b>                                            | <b>4</b>         |                               | <b>69.9</b>                                 | <b>2</b>        | <b>78.5</b>                             | <b>78.2</b>                              | <b>6.6</b>                                     | <b>28.5</b>                                       | <b>42.8</b>                                               | <b>31.2</b>                             |
| <b>Min</b>                   |                  | <b>2</b>                 | <b>0.0</b>                                  | <b>0.4</b>       | <b>0.0</b>                                            | <b>2</b>         |                               | <b>33.5</b>                                 | <b>1</b>        | <b>67.7</b>                             | <b>65.3</b>                              | <b>0.1</b>                                     | <b>14.1</b>                                       | <b>36.7</b>                                               | <b>10.8</b>                             |
| <b>Max</b>                   |                  | <b>19</b>                | <b>5.4</b>                                  | <b>5.0</b>       | <b>5.9</b>                                            | <b>6</b>         |                               | <b>89.4</b>                                 | <b>5</b>        | <b>89.4</b>                             | <b>89.4</b>                              | <b>14.1</b>                                    | <b>41.0</b>                                       | <b>67.9</b>                                               | <b>51.5</b>                             |
|                              |                  |                          |                                             |                  |                                                       |                  |                               |                                             |                 |                                         |                                          |                                                |                                                   |                                                           |                                         |
| 4                            | LGI1-1, m        | 73                       | 4                                           | 2                | 6.3                                                   | 1                | IA                            | 15.9                                        | 0               | 72.3                                    | 68.3                                     | 4.0                                            | 4.0                                               | 70.8                                                      | Ongoing                                 |
| 4,5                          | LGI1-2, m        | 59                       | 47.9                                        | 1                | 6.1                                                   | 5                | Pred, Aza, MMF, IA, IVIG      | 117.2                                       | 0               | 125.5                                   | 77.6                                     | 86.7                                           | 86.7                                              | 38.8                                                      | 7.2                                     |
| 4                            | LGI1-3, f        | 51                       | 0.1                                         | 0                | 1.1                                                   | 1                | Pred                          | 0.2                                         | 0               | 84.1                                    | 84.0                                     | 0.2                                            | 0.2                                               | 84                                                        | 1.7                                     |
| 4,7                          | LGI1-4, f        | 65                       | 12.7                                        | 1.3              | 13                                                    | 4                | Pred, Aza, MMF, IA            | 82.6 <sup>2</sup>                           | 1               | 95.6                                    | 82.9                                     | 18.3                                           | 37.4                                              | 58.2                                                      | 24                                      |
| 4,8                          | LGI1-5, m        | 14                       | 1                                           | 0                | 1.1                                                   | 3                | Pred, PEX, MMF                | 15.6                                        | 0               | 59.8                                    | 58.8                                     | 1.6                                            | 1.6                                               | 58.2                                                      | Never had ASM                           |
| 4                            | LGI1-6, m        | 76                       | 0.4                                         | 0                | 0.6                                                   | 3                | Pred, Aza, IVIG               | 90.7 <sup>2</sup>                           | 1               | 91.3                                    | 90.9                                     | 6.9                                            | 53.5                                              | 53.5                                                      | Ongoing                                 |
| 4,5                          | LGI1-7, m        | 73                       | 9.7                                         | 1.3              | 8.2                                                   | 3                | Pred, IVIG, Aza               | 16                                          | Never remitted  | 68.2                                    | 58.5                                     | Ongoing                                        | Ongoing                                           | Ongoing                                                   | Ongoing                                 |
| 4,5                          | LGI1-8, m        | 50                       | 9.9                                         | 3.6              | 10.1                                                  | 2                | Pred, Aza                     | 12                                          | 0               | 85.5                                    | 75.6                                     | 10.2                                           | 10.2                                              | 75.3 <sup>3</sup>                                         | Ongoing                                 |

| Refs, descriptive statistics | Patient no., sex | Age at disease onset [y] | Time to antibody diagnosis [mo after onset] | ASM, maximum DDD | Time to start of first immunotherapy [mo after onset] | No. of immunotxs | Immunotherapies     | Duration of immunotherapy [mo] <sup>1</sup> | No. of relapses | Time to last follow-up [mo after onset] | From ab detection to last follow-up [mo] | Time to first seizure freedom [mo after onset] | Time to terminal seizure freedom [mo after onset] | Duration of seizure freedom at most recent follow-up [mo] | Duration to discontinuation of ASM [mo] |
|------------------------------|------------------|--------------------------|---------------------------------------------|------------------|-------------------------------------------------------|------------------|---------------------|---------------------------------------------|-----------------|-----------------------------------------|------------------------------------------|------------------------------------------------|---------------------------------------------------|-----------------------------------------------------------|-----------------------------------------|
| <sup>4</sup>                 | LG11-9, m        | 67                       | 7.6 <sup>4</sup>                            | 1                | 1                                                     | 2                | Pred, Aza           | 150.2                                       | 2               | 172.0                                   | 164.4                                    | 1.2                                            | 119.7                                             | 52.5                                                      | 151.2                                   |
| <sup>4</sup>                 | LG11-10, m       | 49                       | 0.1                                         | 2.5              | 0.4                                                   | 1                | IA                  | 0.2                                         | 0               | 77.0                                    | 76.9                                     | 8.0                                            | 8.0                                               | 71.3                                                      | 44                                      |
| <sup>4</sup>                 | LG11-11, f       | 65                       | 12.2                                        | 0.6              | 13.2                                                  | 4                | Pred, IA, IVIG, Aza | 46.1 <sup>2</sup>                           | 0               | 59.3                                    | 47.1                                     | 21.0                                           | 21.0                                              | 38.3                                                      | 26.2                                    |
| <b>Med</b>                   | m/f: 8/3         | <b>65</b>                | <b>7.6</b>                                  | <b>1.0</b>       | <b>6.1</b>                                            | <b>3</b>         |                     | <b>16.0</b>                                 | <b>0</b>        | <b>84.1</b>                             | <b>76.9</b>                              | <b>7.4</b>                                     | <b>15.6</b>                                       | <b>58.2</b>                                               | <b>25.1</b>                             |
| <b>Min</b>                   |                  | <b>14</b>                | <b>0.1</b>                                  | <b>0.0</b>       | <b>0.4</b>                                            | <b>1</b>         |                     | <b>0.2</b>                                  | <b>0</b>        | <b>59.3</b>                             | <b>47.1</b>                              | <b>0.2</b>                                     | <b>0.2</b>                                        | <b>38.3</b>                                               | <b>1.7</b>                              |
| <b>Max</b>                   |                  | <b>76</b>                | <b>47.9</b>                                 | <b>3.6</b>       | <b>13.2</b>                                           | <b>5</b>         |                     | <b>150.2</b>                                | <b>2</b>        | <b>172.0</b>                            | <b>164.4</b>                             | <b>86.7</b>                                    | <b>119.7</b>                                      | <b>84.0</b>                                               | <b>151.2</b>                            |
|                              |                  |                          |                                             |                  |                                                       |                  |                     |                                             |                 |                                         |                                          |                                                |                                                   |                                                           |                                         |
| <sup>3,4</sup>               | CASPR2-1, m      | 75                       | 20.3 <sup>4</sup>                           | <b>3.6</b>       | 15.8                                                  | 4                | Pred, Aza, IA, IVIG | 28.4                                        | 0               | 77.3                                    | 57.0                                     | 37.0                                           | 37.0                                              | 40.5                                                      | Ongoing                                 |
| <sup>3,4</sup>               | CASPR2-2, m      | 56                       | 17.6 <sup>4</sup>                           | 3.2              | 14.1                                                  | 2                | Pred, Aza           | 71.6 <sup>2</sup>                           | 0               | 85.7                                    | 68.1                                     | 14.5                                           | 14.5                                              | 71.3                                                      | Ongoing                                 |
| <sup>4</sup>                 | CASPR2-3, m      | 75                       | 0.8 <sup>4</sup>                            | 1.3              | 0.6                                                   | 3                | Pred, IA, Aza       | 55.1 <sup>2</sup>                           | 2               | 55.7                                    | 54.9                                     | 6.0                                            | 34.4                                              | 21.2                                                      | 54.9                                    |
| <sup>3-5</sup>               | CASPR2-4, m      | 69                       | 15.4                                        | 1.6              | 15.5                                                  | 3                | Pred, IA, MMF       | 28.1                                        | 0               | 114.9                                   | 99.5                                     | Ongoing                                        | Ongoing                                           | Ongoing                                                   | Ongoing                                 |
| <sup>3,4</sup>               | CASPR2-5, m      | 68                       | 18.2 <sup>4</sup>                           | 1.3              | 5.6                                                   | 3                | Pred, Aza, IVIG     | 60.9 <sup>2</sup>                           | 2               | 66.5 <sup>5</sup>                       | 48.3                                     | 6.9                                            | 38.0                                              | 28.5                                                      | Ongoing                                 |
| <sup>3,4</sup>               | CASPR2-6, m      | 69                       | 8.9                                         | Unknown          | 8.9                                                   | 2                | Pred, MMF           | 14.4                                        | 0               | 89.8                                    | 80.9                                     | 11.2                                           | 11.2                                              | 78.7                                                      | Ongoing                                 |
| <sup>3,4</sup>               | CASPR2-7, m      | 70                       | 0                                           | 1.9              | 1.4                                                   | 4                | Pred, IA, MMF, Rtx  | 38.5                                        | Never remitted  | 94.4                                    | 94.4                                     | Ongoing                                        | Ongoing                                           | Ongoing                                                   | Ongoing                                 |
| <sup>4</sup>                 | CASPR2-8, m      | 49                       | 1.2                                         | Unknown          | 2                                                     | 4                | Pred, Aza, IA, IVIG | 46.3 <sup>2</sup>                           | 1               | 48.3                                    | 47.1                                     | 25.8                                           | 25.8                                              | 22.7                                                      | Ongoing                                 |
| <b>Med</b>                   | m/f: 8/0         | <b>69</b>                | <b>12.2</b>                                 | 1.75             | <b>7.3</b>                                            | <b>3</b>         |                     | <b>42.4</b>                                 | <b>0</b>        | <b>81.5</b>                             | <b>62.5</b>                              | <b>12.8</b>                                    | <b>30.1</b>                                       | <b>34.5</b>                                               | <b>54.9</b>                             |
| <b>Min</b>                   |                  | <b>49</b>                | <b>0.0</b>                                  | <b>1.3</b>       | <b>0.6</b>                                            | <b>2</b>         |                     | <b>14.4</b>                                 | <b>0</b>        | <b>48.3</b>                             | <b>47.1</b>                              | <b>6.0</b>                                     | <b>11.2</b>                                       | <b>21.2</b>                                               | <b>54.9</b>                             |
| <b>Max</b>                   |                  | <b>75</b>                | <b>20.3</b>                                 | <b>3.6</b>       | <b>15.8</b>                                           | <b>4</b>         |                     | <b>71.6</b>                                 | <b>2</b>        | <b>114.9</b>                            | <b>99.5</b>                              | <b>37.0</b>                                    | <b>38.0</b>                                       | <b>78.7</b>                                               | <b>54.9</b>                             |
|                              |                  |                          |                                             |                  |                                                       |                  |                     |                                             |                 |                                         |                                          |                                                |                                                   |                                                           |                                         |
| <sup>4,5</sup>               | GAD65-1, f       | 31                       | 333.1                                       |                  | 336                                                   | 3                | Pred, IA, MMF       | 6.2                                         | Never remitted  | 421.2                                   | 88.1                                     | 421.2                                          | Ongoing                                           | Ongoing                                                   | Ongoing                                 |
| <sup>4-6</sup>               | GAD65-2, f       | 24                       | 94.6                                        | 3                | 118.1                                                 | 4                | Pred, MMF, IA, IVIG | 32.8                                        | Never remitted  | 186.3                                   | 91.7                                     | 186.3                                          | Ongoing                                           | Ongoing                                                   | Ongoing                                 |
| <sup>4</sup>                 | GAD65-3, m       | 22                       | 21.1                                        | 3.3              | 27.7                                                  | 2                | Pred, IA            | 4.8                                         | Never remitted  | 89.8                                    | 68.7                                     | 89.8                                           | Ongoing                                           | Ongoing                                                   | Ongoing                                 |
| <sup>1,4,6</sup>             | GAD65-4, f       | 23                       | 9.5                                         | 2.3              | 10                                                    | 3                | Pred, Aza, IVIG     | 165.7 <sup>2</sup>                          | Never remitted  | 175.7                                   | 166.2                                    | 175.0                                          | Ongoing                                           | Ongoing                                                   | Ongoing                                 |



| Refs, descriptive statistics | Patient no., sex | Age at disease onset [y] | Time to antibody diagnosis [mo after onset] | ASM, maximum DDD | Time to start of first immunotherapy [mo after onset] | No. of immunotxs | Immunotherapies                            | Duration of immunotherapy [mo] <sup>1</sup> | No. of relapses | Time to last follow-up [mo after onset] | From ab detection to last follow-up [mo] | Time to first seizure freedom [mo after onset] | Time to terminal seizure freedom [mo after onset] | Duration of seizure freedom at most recent follow-up [mo] | Duration to discontinuation of ASM [mo] |
|------------------------------|------------------|--------------------------|---------------------------------------------|------------------|-------------------------------------------------------|------------------|--------------------------------------------|---------------------------------------------|-----------------|-----------------------------------------|------------------------------------------|------------------------------------------------|---------------------------------------------------|-----------------------------------------------------------|-----------------------------------------|
| 2, 4, 6                      | GAD65-5, f       | 8                        | 280.1 <sup>4</sup>                          | 6.8              | 279.5                                                 | 4                | Pred, IA, IVIG, Cyc                        | 36.9                                        | Never remitted  | 323.8                                   | 43.7                                     | 323.8                                          | Ongoing                                           | Ongoing                                                   | Ongoing                                 |
| 4, 6                         | GAD65-6, f       | 15                       | 35                                          | 4.8              | 35                                                    | 6                | Pred, MMF, IA, IVIG, Cyc, Natalizumab      | 52.3                                        | Never remitted  | 165.3                                   | 130.3                                    | 165.3                                          | Ongoing                                           | Ongoing                                                   | Ongoing                                 |
| 4, 6                         | GAD65-7, f       | 21                       | 61.2 <sup>4</sup>                           | 5.8              | 7.1                                                   | 7                | Pred, Aza, IA, IVIG, Rtx, Cyc, Basiliximab | 141.5                                       | Never remitted  | 162.3                                   | 101.1                                    | 162.3                                          | Ongoing                                           | Ongoing                                                   | Ongoing                                 |
| 4, 5                         | GAD65-8, f       | 31                       | 72                                          | 4.2              | 39.6                                                  | 2                | Pred, IA                                   | 37.4                                        | Never remitted  | 158.9                                   | 86.9                                     | 158.9                                          | Ongoing                                           | Ongoing                                                   | Ongoing                                 |
| 4                            | GAD65-9, f       | 15                       | 117.3 <sup>4</sup>                          | 3.8              | 13.2                                                  | 4                | Pred, IVIG, Cyc, Natalizumab               | 128.5                                       | Never remitted  | 200.1                                   | 82.8                                     | 200.1                                          | Ongoing                                           | Ongoing                                                   | Ongoing                                 |
| 4                            | GAD65-10, f      | 7                        | 0                                           | 2.5              | 13.8                                                  | 2                | Pred, Rtx,                                 | 29.7                                        | Never remitted  | 46.5                                    | 46.5                                     | 46.5                                           | Ongoing                                           | Ongoing                                                   | Ongoing                                 |
| 4, 5                         | GAD65-11, f      | 23                       | 138.1                                       | 3                | 138.6                                                 | 2                | Pred, IA                                   | 6                                           | Never remitted  | 228.3                                   | 90.2                                     | 228.3                                          | Ongoing                                           | Ongoing                                                   | Ongoing                                 |
| 4                            | GAD65-12, f      | 15                       | 1                                           | 2.8              | 1.5                                                   | 1                | Pred                                       | 5                                           | 0               | 36.4                                    | 36.4                                     | 4.0                                            | 4.0                                               | 32.4                                                      | Never had ASM                           |
| 4                            | GAD65-13, f      | 16                       | 37.6                                        | 0                | 40.9                                                  | 1                | Pred                                       | 61.4 <sup>2</sup>                           | Never remitted  | 102.3                                   | Ongoing                                  | 101.9                                          | Ongoing                                           | Ongoing                                                   | Ongoing                                 |
| <b>Med</b>                   | m/f: 1/12        | <b>21</b>                | <b>61.2</b>                                 | 3.15             | <b>35.0</b>                                           | <b>3</b>         |                                            | <b>36.9</b>                                 | <b>0</b>        | <b>165.3</b>                            | <b>87.5</b>                              | <b>165.3</b>                                   | <b>5.0</b>                                        | <b>31.4</b>                                               | -                                       |
| <b>Min</b>                   |                  | <b>7</b>                 | <b>0.0</b>                                  | <b>0.0</b>       | <b>1.5</b>                                            | <b>1</b>         |                                            | <b>4.8</b>                                  | <b>0</b>        | <b>36.4</b>                             | <b>36.4</b>                              | <b>5.0</b>                                     | <b>5.0</b>                                        | <b>31.4</b>                                               | -                                       |
| <b>Max</b>                   |                  | <b>31</b>                | <b>333.1</b>                                | <b>6.8</b>       | <b>336.0</b>                                          | <b>7</b>         |                                            | <b>165.7</b>                                | <b>0</b>        | <b>421.2</b>                            | <b>166.2</b>                             | <b>421.2</b>                                   | <b>5.0</b>                                        | <b>31.4</b>                                               | -                                       |
|                              |                  |                          |                                             |                  |                                                       |                  |                                            |                                             |                 |                                         |                                          |                                                |                                                   |                                                           |                                         |
|                              | <b>Ma2, m</b>    | 25                       | 91.1                                        | 2.9              | 91.2                                                  | 2                | Pred, Aza                                  | 20                                          |                 | 111.2                                   | 41.2                                     | Ongoing                                        | Ongoing                                           | Ongoing                                                   | Ongoing                                 |

<sup>1</sup>Duration from first to final dose (intervals without immunotherapy included). <sup>2</sup>Duration is identical with difference between “last follow-up” and “start of immunotherapy”, i.e., immunotherapy was ongoing at most recent follow-up. <sup>3</sup>One subclinical seizure pattern recorded on long-term EEG 82.8 months after disease onset. Not counted here. <sup>4</sup>First titer in this laboratory; probably, the antibody diagnosis was made in an external lab earlier on. <sup>5</sup>Died from liver failure.

Abbreviations: ASM, anti-seizure medication; Aza, azathioprine; Cyc, cyclophosphamide; DDD, defined daily doses; f, female; IA, immunoadsorption; IVIG, intravenous immunoglobulins; m, male; Max, maximum; Med, median; Min, minimum; MMF, mycophenolate-mofetil; mo, months; No., number; PEX, plasma exchange; Pred, oral prednisolone or intravenous methylprednisolone; Refs, references including the respective case (usually with shorter observational period); Rtx, rituximab; y, years

**Supplementary table 2:** Year-wise proportion of seizure free patients

| Delay (years) | NMDAR antibodies      |                          | LG11 antibodies*      |                          | CASPR2 antibodies     |                          | GAD/Ma2 antibodies**  |                          | Ma2 antibodies        |                          |
|---------------|-----------------------|--------------------------|-----------------------|--------------------------|-----------------------|--------------------------|-----------------------|--------------------------|-----------------------|--------------------------|
|               | First seizure freedom | Terminal seizure freedom | First seizure freedom | Terminal seizure freedom | First seizure freedom | Terminal seizure freedom | First seizure-freedom | Terminal seizure freedom | First seizure freedom | Terminal seizure freedom |
| 1             | 67%                   | 0%                       | 64%                   | 46%                      | 38%                   | 13%                      | 8%                    | 8%                       | 8mo]0%                | 0%                       |
| 2             | 83%                   | 33%                      | 82%                   | 55%                      | 50%                   | 25%                      | 8%                    | 8%                       | 0%                    | 0%                       |
| 3             | 83%                   | 50%                      | 82%                   | 55%                      | 63%                   | 50%                      | 8%                    | 8%                       | 0%                    | 0%                       |
| 4             | 83%                   | 67%                      | 82%                   | 64%                      | 75%                   | 75%                      | 8%                    | 8%                       | 0%                    | 0%                       |

\*After 10 years: 91% terminal seizure freedom; \*\*only one patient with GAD65 antibodies became seizure free (within 4 months).

**Supplementary table 3: Patients achieving first seizure freedom after >1 year**

| Patient                                                        | First seizure stop |                                    |                                                   | Terminal seizure stop |                                    |                     |                                                                    | Terminal ASM freedom         |                                                  |
|----------------------------------------------------------------|--------------------|------------------------------------|---------------------------------------------------|-----------------------|------------------------------------|---------------------|--------------------------------------------------------------------|------------------------------|--------------------------------------------------|
|                                                                | Time to [mo]       | Modification of immuno-tx          | Modification of ASM                               | Time to [mo]          | Modification of immuno-tx          | Modification of ASM | Duration of terminal seizure freedom at most recent follow-up [mo] | Time to terminal ASM freedom | Duration of ASM freedom at most recent follow-up |
| Rapid relapses prior to first seizure freedom                  |                    |                                    |                                                   |                       |                                    |                     |                                                                    |                              |                                                  |
| NMDAR-1                                                        | 14                 | Steroids introduced again plus MMF | Increase from shortly discontinued ASM to 0.7 DDD | = first seizure stop  |                                    |                     | 68                                                                 | 52                           | 31                                               |
| CASPR2-8                                                       | 26                 | Steroids introduced again plus MMF | From 0.5 to 2.0 DDD                               | = first seizure stop  |                                    |                     | 23                                                                 | Ongoing ASM                  | -                                                |
| Continuously recurrent seizures prior to first seizure freedom |                    |                                    |                                                   |                       |                                    |                     |                                                                    |                              |                                                  |
| LGI1-2                                                         | 87                 | MMF                                | None <sup>1</sup>                                 | = first seizure stop  |                                    |                     | 39                                                                 | 7                            | 118                                              |
| LGI1-4                                                         | 18                 | Steroids introduced again          | Introduction of ASM, 1.0 DDD                      | 37                    | Steroids introduced again plus MMF | None <sup>2</sup>   | 58                                                                 | 24                           | 72                                               |
| LGI1-11                                                        | 21                 | Steroids introduced again plus IA  | None                                              | = first seizure stop  |                                    |                     | 38                                                                 | 26                           | 33                                               |
| CASPR2-1                                                       | 37                 | IVIG                               | From 2.5 to 3.0 DDD                               | = first seizure stop  |                                    |                     | 41                                                                 | Ongoing ASM                  | -                                                |
| CASPR2-2                                                       | 15                 | Steroids                           | Introduction of ASM, 1.3 DDD                      | = first seizure stop  |                                    |                     | 71                                                                 | Ongoing ASM                  | -                                                |

<sup>1</sup>ASM stopped 80 mo before by patient's decision; <sup>2</sup>ASM stopped 13 mo before by patient's decision

Abbreviations: ASM, anti-seizure medication; CASPR2, contactin-associated protein-2; DDD, defined daily doses (according to World Health Organization); IA, immunoadsorption; immuno-tx, immunotherapy; IVIG, intravenous immunoglobulins; LGI1, leucine-rich glioma inactivated protein 1; MMF, mycophenolate-mofetil; mo, months; NMDAR, N-methyl-D-aspartate receptor

## References

1. Bien CG, Urbach H, Schramm J, Soeder BM, Becker AJ, Voltz R, et al. Limbic encephalitis as a precipitating event in adult-onset temporal lobe epilepsy. *Neurology*. 2007; 69: 1236-44.
2. Bien CG, Vincent A, Barnett MH, Becker AJ, Blümcke I, Graus F, et al. Immunopathology of autoantibody-associated encephalitides: clues for pathogenesis. *Brain*. 2012; 135: 1622-38.
3. Bien CG, Mirzadjanova Z, Baumgartner C, Onugoren MD, Grunwald T, Holtkamp M, et al. Anti-contactin-associated protein-2 encephalitis: relevance of antibody titres, presentation and outcome. *Eur J Neurol*. 2017; 24: 175-86.
4. Bien CG, Bien CI, Dogan Onugoren M, De Simoni D, Eigler V, Haensch C-A, et al. Routine diagnostics for neural antibodies, clinical correlates, treatment and functional outcome. *J Neurol*. 2020; in press.
5. Dogan Onugoren M, Golombeck KS, Bien C, Abu-Tair M, Brand M, Bulla-Hellwig M, et al. Immunoadsorption therapy in autoimmune encephalitides. *Neurol Neuroimmunol Neuroinflamm*. 2016; 3: e207.
6. Malter MP, Frisch C, Zeitler H, Surges R, Urbach H, Helmstaedter C, et al. Treatment of immune-mediated temporal lobe epilepsy with GAD antibodies. *Seizure*. 2015; 30: 57-63.
7. Scherfeld D, Bien CG. Antikörper-vermittelte Epilepsien. *Klin Neurophys*. 2014; 45: 222-9.
8. Schimmel M, Frühwald MC, Bien CG. Limbic encephalitis with LGII antibodies in a 14-year-old boy. *Eur J Paediatr Neurol*. 2018; 22: 190-3.
